# Supplementary material for: Multi-method phenotyping of Long COVID patients using high-dimensional symptom data
Source: Research Square preprint supplement (doi:10.21203/rs.3.rs-4901463/v1), 2024-10-02
Supplement: Supplementary file 1 [file 0288de8478fcf7f173f57c6f.xlsx]

## Sheet: Sheet1
	Symptom	Population	-1		0		1		2		3		4		5
			δ	f	δ	f	δ	f	δ	f	δ	f	δ	f	δ	f
	Memory_short	0.925394	-0.0233239	0.900901	-0.00155817	0.922667	0.0150978	0.939323	-0.020798	0.903427	-0.00454612	0.919679	-0.00657778	0.917647	-0.0119639	0.912261
	Memory_long	0.422067	-0.316089	0.0990991	-0.0347437	0.380444	0.1215	0.536689	-0.122353	0.292835	-0.00354161	0.411647	-0.0881294	0.327059	-0.0372354	0.377953
	Memory_no_new_memories	0.0886165	-0.0650251	0.0225225	-0.0146588	0.0728889	0.0328663	0.120414	-0.0190118	0.0685358	-0.00321032	0.0843373	-0.0287241	0.0588235	-0.00768265	0.079865
	Memory_forget_tasks	0.139405	-0.119936	0.018018	-0.00284279	0.135111	0.0605409	0.198495	-0.0258044	0.11215	-0.0295202	0.108434	-0.0497186	0.0882353	-0.0378414	0.100112
	Memory_other	0.120841	-0.0524789	0.0675676	0.00262024	0.122667	0.0191822	0.139229	-0.0141274	0.105919	-0.00759663	0.11245	-0.0153405	0.104706	-0.0120599	0.107987
	Cognitive_Functioning_thinking	0.671278	-0.589648	0.0765766	0.00133105	0.667556	0.115996	0.78222	-0.0899005	0.576324	0.0185144	0.684739	-0.0603422	0.605882	-0.0520513	0.614173
	Cognitive_Functioning_executive	0.594221	-0.507544	0.0810811	-0.0206254	0.568	0.120688	0.709313	-0.0995289	0.489097	0.0318565	0.620482	-0.067449	0.521176	-0.0531924	0.535433
	Cognitive_Functioning_problemsolving	0.562347	-0.457857	0.0990991	-0.0227335	0.534222	0.124136	0.681091	-0.0958965	0.461059	0.0113174	0.568273	-0.0734263	0.483529	-0.0552684	0.501687
	Cognitive_Functioning_slowedthoughts	0.434676	-0.317664	0.112613	0.00527865	0.435556	0.0974747	0.527752	-0.078252	0.352025	-0.00457409	0.425703	-0.0808651	0.349412	-0.0523241	0.377953
	Cognitive_Functioning_fastthoughts	0.178634	-0.110208	0.0630631	-0.0283825	0.144889	0.0732008	0.246472	-0.0953898	0.0778816	-0.0106208	0.162651	-0.0673891	0.105882	-0.00679224	0.166479
	Cognitive_Functioning_agnosia	0.110333	-0.0722379	0.036036	-0.0158295	0.0924444	0.0521212	0.160395	-0.0366228	0.0716511	-0.0239366	0.0843373	-0.0423916	0.0658824	-0.01941	0.0888639
	Cognitive_Functioning_attentionconcentration	0.757443	-0.527718	0.225225	0.00616798	0.759111	0.0890136	0.841957	-0.0800459	0.672897	0.0382215	0.791165	-0.0811784	0.671765	-0.00378677	0.749156
	Cognitive_Functioning_other	0.0894921	-0.0555187	0.0315315	0.0125053	0.0995556	0.0164305	0.103481	-0.0434365	0.0436137	0.0113433	0.0983936	-0.0199914	0.0670588	-0.0128095	0.0742407
	Speech_difficulty_finding_words	0.491594	-0.354364	0.130631	0.00567247	0.490667	0.131657	0.616651	-0.117393	0.367601	0.00295761	0.487952	-0.136759	0.348235	-0.0620471	0.422947
	Speech_difficulty_communicating_verbally	0.312609	-0.220665	0.0855856	0.00130452	0.307556	0.109083	0.415334	-0.113105	0.193146	-0.0211105	0.285141	-0.0921334	0.214118	-0.066656	0.239595
	Speech_difficulty_reading_processing_text	0.265324	-0.205439	0.0540541	-0.0132704	0.246222	0.109745	0.369238	-0.103729	0.155763	-0.00648057	0.253012	-0.100669	0.158824	-0.0570179	0.202475
	Speech_difficulty_understanding_others_speech	0.265324	-0.205604	0.0540541	-0.0249918	0.234667	0.119457	0.379116	-0.10078	0.158879	-0.0166865	0.242972	-0.0996584	0.16	-0.0616832	0.197975
	Speech_difficulty_speaking_complete_sentences	0.239229	-0.202592	0.0315315	0.00143186	0.235556	0.0913702	0.325494	-0.0908215	0.143302	0.00483213	0.238956	-0.0964766	0.137647	-0.047397	0.186727
	Speech_speaking_unrecognizable_words	0.0978984	-0.0766595	0.018018	-0.00756639	0.0871111	0.0548992	0.149577	-0.0572943	0.0373832	-0.0123482	0.0823293	-0.0464422	0.0482353	-0.0305605	0.064117
	Speech_difficulty_communicating_writing	0.170928	-0.122257	0.045045	-0.00908005	0.158222	0.0777589	0.245061	-0.0644985	0.102804	0.00137243	0.168675	-0.0814199	0.0858824	-0.0435677	0.123735
	Speech_changes_to_secondary_languages	0.0567426	-0.0376941	0.018018	-0.0041566	0.0515556	0.0204873	0.0761994	-0.018329	0.0373832	-0.0175595	0.0381526	-0.0157122	0.04	-0.00284376	0.0528684
	Speech_other	0.0441331	-0.0205881	0.0225225	-0.00133282	0.0417778	0.0175667	0.0606773	-0.0181885	0.0249221	-0.0109821	0.0321285	-0.00899295	0.0341176	-0.0138643	0.0292463
	Headaches_behind_eyes	0.407005	-0.289145	0.112613	-0.00264647	0.399111	0.112353	0.514111	-0.0933464	0.308411	-0.0142074	0.38755	-0.0923458	0.309412	-0.0631749	0.338583
	Headaches_stiff_neck	0.404203	-0.314348	0.0855856	-0.00437812	0.395556	0.125466	0.5254	-0.0759461	0.323988	0.0659298	0.465863	-0.142287	0.257647	-0.0894725	0.310461
	Headaches_brain_pressure	0.342032	-0.255016	0.0810811	0.00968094	0.345778	0.112163	0.44826	-0.105567	0.23053	-0.0188278	0.317269	-0.139626	0.196471	-0.0346345	0.301462
	Headaches_diffuse	0.347461	-0.307522	0.036036	0.0182195	0.361778	0.0830645	0.426623	-0.069415	0.274143	0.00784734	0.351406	-0.0894406	0.254118	-0.0387214	0.304837
	Headaches_temples	0.352189	-0.253772	0.0945946	-0.00614455	0.342222	0.0787264	0.427093	-0.0679929	0.280374	0.0552477	0.403614	-0.0813079	0.267059	-0.0457796	0.302587
	Headaches_base_of_skull	0.287215	-0.236666	0.045045	-0.00793338	0.273778	0.101638	0.383349	-0.0979105	0.183801	0.0375659	0.319277	-0.109946	0.171765	-0.0544896	0.227222
	Headaches_after_mental_exertion	0.274081	-0.22307	0.045045	-0.0227814	0.245333	0.113823	0.381938	-0.106121	0.161994	0.029074	0.297189	-0.108115	0.16	-0.0622655	0.205849
	Headaches_migraines	0.245009	-0.205383	0.036036	-0.0227527	0.218667	0.0741968	0.315616	-0.0638492	0.17757	0.0376971	0.279116	-0.0743605	0.167059	-0.0243215	0.217098
	Headaches_other	0.134676	-0.0702482	0.0630631	0.00268877	0.136	0.0294357	0.162747	-0.024277	0.109034	0.00122693	0.134538	-0.0391936	0.0941176	-0.0107016	0.12261
	Headaches_brain_warmth	0.123643	-0.102526	0.018018	-0.00676608	0.113778	0.0633696	0.183913	-0.0551233	0.0654206	-0.0121101	0.108434	-0.0628968	0.0576471	-0.0305551	0.0899888
	Loss_of_smell	0.395096	-0.00925772	0.382883	0.0105261	0.402667	0.0260156	0.418156	-0.0525767	0.339564	0.0375783	0.429719	-0.05567	0.336471	-0.0220619	0.370079
	Loss_of_taste	0.361121	-0.0428342	0.315315	0.0187393	0.376889	0.0355475	0.393697	-0.0528536	0.305296	0.00329622	0.361446	-0.0569731	0.301176	-0.026316	0.331834
	Altered_taste	0.281436	-0.035815	0.243243	0.00183069	0.280889	0.0713651	0.350423	-0.0422981	0.23676	-0.016006	0.263052	-0.0708229	0.208235	-0.0720841	0.206974
	Phantom_smell	0.252189	-0.0822141	0.166667	-0.00799189	0.240889	0.0869612	0.335842	-0.0588496	0.190031	-0.0340213	0.214859	-0.104175	0.144706	-0.0374072	0.211474
	Altered_smell	0.227846	-0.0331344	0.193694	0.00161639	0.228444	0.0492773	0.276105	-0.0181053	0.208723	-0.0220088	0.204819	-0.0656516	0.161176	-0.0299777	0.19685
	Phantom_taste	0.0996497	-0.031421	0.0675676	-0.015433	0.0835556	0.0472955	0.146284	-0.0117611	0.0872274	-0.0266994	0.0722892	-0.0472239	0.0517647	-0.0213733	0.0776153
	Heightened_smell	0.0837128	-0.0552147	0.027027	-0.0137973	0.0684444	0.049461	0.131703	-0.026167	0.0560748	-0.0139687	0.0682731	-0.0469476	0.0352941	-0.0248739	0.0573678
	Heightened_taste	0.0316988	-0.0218316	0.00900901	-0.00417399	0.0266667	0.0204293	0.05127	-0.0152643	0.0155763	-0.00272821	0.0281124	-0.0202524	0.0105882	-0.011718	0.0191226
	Vibrating_sensations	0.415587	-0.238711	0.171171	0.000784392	0.410667	0.125866	0.535748	-0.101471	0.308411	-0.000243721	0.409639	-0.135765	0.274118	-0.075799	0.334083
	Tremors	0.410683	-0.22774	0.175676	-0.00963791	0.393778	0.132803	0.536218	-0.129272	0.274143	0.0222871	0.425703	-0.157533	0.245882	-0.0637081	0.339708
	Insomnia	0.712434	-0.558116	0.135135	-0.376807	0.316444	0.306748	1	-0.341227	0.352025	0.300724	0.993976	-0.46031	0.232941	0.277502	0.970754
	Night_sweats	0.411033	-0.364395	0.036036	-0.0155422	0.384889	0.239738	0.640169	-0.188593	0.211838	-0.0510335	0.349398	-0.272196	0.128235	-0.105718	0.294713
	Awakened_cannot_breathe	0.335026	-0.258885	0.0720721	-0.0536234	0.277333	0.135177	0.466134	-0.0723897	0.258567	0.0586015	0.389558	-0.183898	0.147059	-0.0216204	0.309336
	Vivid_dreams	0.325919	-0.289311	0.0315315	-0.0310645	0.289778	0.120362	0.441204	-0.0903127	0.23053	0.00445889	0.325301	-0.144372	0.176471	-0.0081314	0.312711
	Nightmares	0.246235	-0.205217	0.036036	-0.0483646	0.192889	0.112933	0.354186	-0.0886055	0.152648	0.0157746	0.257028	-0.134195	0.107059	-0.00615791	0.235096
	Restless_leg	0.194221	-0.162825	0.027027	-0.0636302	0.126222	0.0989528	0.288805	-0.0777029	0.11215	0.022999	0.212851	-0.118088	0.0717647	0.0126223	0.202475
	Lucid_dreams	0.160245	-0.102636	0.0540541	-0.0224682	0.134222	0.0596783	0.216369	-0.0632325	0.0934579	0.00596017	0.162651	-0.0708081	0.0858824	-0.00145984	0.155231
	Sleep_apnea	0.130473	-0.0766318	0.0495495	-0.0488481	0.0773333	0.070432	0.196613	-0.0763372	0.0498442	0.0163889	0.14257	-0.0673579	0.0588235	-0.00469658	0.121485
	Sleep_other	0.537303	-0.393301	0.135135	-0.0235475	0.504889	0.160651	0.689087	-0.15772	0.370717	-0.064581	0.463855	-0.123731	0.404706	-0.0447469	0.48369
	Difficulty_falling_asleep	0.428371	-0.387553	0.018018	-0.405571	0	0.319264	0.724835	-0.405571	0	0.259087	0.664659	-0.405571	0	0.235599	0.64117
	Waking_up_early	0.256918	-0.214696	0.0315315	-0.197339	0.0488889	0.168165	0.414393	-0.190153	0.0560748	0.135298	0.381526	-0.209757	0.0364706	0.0946046	0.340832
	Waking_up_in_night	0.510508	-0.460814	0.0225225	-0.483336	0	0.368498	0.851834	-0.483336	0	0.343973	0.827309	-0.483336	0	0.289442	0.772778
	Hallucinations_visual	0.105079	-0.0807771	0.0225225	-0.020633	0.0826667	0.0575659	0.160865	-0.0316485	0.0716511	-0.00892211	0.0943775	-0.0515349	0.0517647	-0.0256843	0.0776153
	Hallucinations_auditory	0.0725044	-0.0621235	0.00900901	-0.018688	0.0524444	0.0455185	0.116651	-0.0244035	0.046729	0.00115667	0.0722892	-0.032309	0.0388235	-0.0306375	0.0404949
	Hallucinations_tactile	0.0348511	-0.0201459	0.0135135	-0.00965943	0.024	0.0270179	0.0606773	-0.0211984	0.0124611	0.00047712	0.0341365	-0.0266006	0.00705882	-0.0145368	0.0191226
	Hallucinations_other	0.0227671	-0.0143702	0.00900901	-0.00293476	0.0204444	0.0118983	0.0352775	0.0108887	0.0342679	0.00272521	0.0261044	-0.0116145	0.0117647	-0.0155052	0.00787402
	Sensations_skin_burning_no_rash	0.464448	-0.26361	0.193694	0.00580718	0.463111	0.149469	0.606773	-0.127086	0.330218	-0.0275851	0.429719	-0.163186	0.294118	-0.0816009	0.375703
	Sensations_numbness_loss_sensation	0.367951	-0.209142	0.153153	-0.024517	0.337778	0.126887	0.489182	-0.100613	0.261682	0.00115901	0.363454	-0.136412	0.225882	-0.0540833	0.308211
	Sensations_numbness_one_sided_weakness	0.131349	-0.0876306	0.0405405	-0.0241711	0.104	0.0580942	0.186265	-0.05652	0.0716511	-0.00367312	0.124498	-0.0587594	0.0694118	-0.00781116	0.12036
	Sensations_coldness	0.359019	-0.244404	0.108108	0.0741546	0.426667	0.155484	0.507996	-0.115752	0.23676	-0.041267	0.311245	-0.199571	0.152941	-0.148912	0.2036
	Sensations_tingling_prickling	0.485639	-0.291826	0.189189	-0.00812587	0.472889	0.12717	0.608184	-0.0822609	0.398754	-0.00711917	0.473896	-0.143368	0.337647	-0.0501936	0.430821
	Sensations_electrical_zaps	0.256217	-0.169789	0.0810811	-0.0028705	0.248	0.111782	0.362653	-0.0951073	0.155763	-0.00187452	0.248996	-0.128518	0.122353	-0.063019	0.187852
	Sensations_weakness	0.467075	-0.331648	0.130631	0.00972177	0.472	0.12474	0.587018	-0.0853312	0.376947	-0.00846297	0.453815	-0.136396	0.325882	-0.0618283	0.40045
	Sensations_facial_pressure_left	0.0812609	-0.0657437	0.0135135	-0.0045905	0.0746667	0.0373938	0.116651	-0.0356435	0.0436137	-0.00495998	0.0742972	-0.0286689	0.0505882	-0.0241391	0.0551181
	Sensations_facial_pressure_right	0.0700525	-0.0454596	0.0225225	-0.00842654	0.0595556	0.0369097	0.104892	-0.0368294	0.0311526	-0.00171703	0.0662651	-0.030335	0.0376471	-0.0229877	0.0449944
	Sensations_facial_pressure_other	0.0604203	-0.0466755	0.0135135	-0.00507791	0.0551111	0.0235363	0.0837253	-0.00411426	0.0560748	-0.00998822	0.0502008	-0.0260714	0.0341176	-0.00619577	0.0539933
	Sensations_facial_paralysis	0.0325744	-0.0320013	0	-0.00622355	0.0257778	0.0173872	0.0493885	-0.0101945	0.0218069	0.00615128	0.0381526	-0.0155307	0.0164706	-0.010629	0.0213723
	Temp_lability	0.370578	-0.293456	0.0855856	0.134736	0.513778	0.183047	0.562088	0.150553	0.529595	0.179191	0.558233	-0.353159	0.0258824	-0.352045	0.0269966
	Heat_intolerance	0.279685	-0.191649	0.0855856	0.0187657	0.296	0.175259	0.452493	-0.0435894	0.233645	0.052083	0.329317	-0.218411	0.0588235	-0.199619	0.0776153
	Merged_temperature_other_temp_issues	0.390018	-0.30089	0.0900901	0.13702	0.528	0.176283	0.567262	0.0171198	0.4081	-0.00945383	0.381526	-0.273333	0.117647	-0.259371	0.131609
	Elevated_temp	0.525044	-0.419693	0.130631	0.166121	0.716444	0.230956	0.781279	0.449677	1	0.449677	1	-0.550323	0	-0.545824	0.00449944
	Fever	0.294046	-0.267424	0.0315315	0.1126	0.411556	0.155889	0.454845	0.0873374	0.386293	0.0825707	0.381526	-0.271897	0.0270588	-0.266334	0.0326209
	Low_temp	0.197548	-0.140109	0.0540541	0.0396143	0.233778	0.135093	0.329257	-0.0602071	0.133956	-0.00942453	0.184739	-0.158869	0.0352941	-0.159293	0.0348706
	Chills_flushing_sweats	0.573205	-0.470624	0.0720721	0.457304	1	0.457304	1	-0.542696	0	-0.542696	0	-0.542696	0	-0.535947	0.00674916
	Tachycardia	0.59352	-0.335516	0.256757	-0.000273255	0.592	0.126918	0.719191	-0.0221798	0.570093	0.0884496	0.680723	-0.192273	0.4	-0.0770877	0.515186
	Bradycardia	0.1669	-0.114768	0.0495495	-0.00431769	0.16	0.0642806	0.228598	-0.0459376	0.11838	0.00636504	0.170683	-0.0807883	0.0835294	-0.0293346	0.134983
	Heart_palpitations	0.66007	-0.368153	0.288288	0.0351138	0.691556	0.11543	0.771872	-0.0645414	0.5919	0.0102249	0.666667	-0.168206	0.488235	-0.0501425	0.606299
	Bulging_veins	0.168651	-0.11977	0.045045	0.0094071	0.174222	0.0807164	0.245532	-0.0682419	0.0965732	-0.0182288	0.146586	-0.0930504	0.0717647	-0.0512043	0.113611
	Fainting	0.130648	-0.105151	0.0225225	-0.00411813	0.123556	0.059062	0.186736	-0.0529073	0.0747664	0.00084037	0.128514	-0.0523796	0.0752941	-0.0410595	0.0866142
	Dizziness_vertigo	0.677233	-0.528381	0.144144	0.0190303	0.691556	0.140269	0.812794	-0.0837402	0.588785	0.032294	0.704819	-0.139584	0.532941	-0.0819741	0.590551
	Neuralgia	0.319965	-0.237799	0.0765766	-0.0112646	0.303111	0.127299	0.441675	-0.0994225	0.214953	0.0149415	0.329317	-0.142611	0.171765	-0.0669067	0.247469
	Gasping_air_normal_oxygen	0.567601	-0.332007	0.234234	0.0257589	0.592	0.108265	0.674506	-0.024185	0.542056	0.0201043	0.586345	-0.10977	0.456471	-0.106174	0.460067
	New_anaphylaxis	0.0441331	-0.0294313	0.0135135	-0.00472256	0.0382222	0.0276102	0.070555	-0.0211379	0.0218069	0.00323995	0.0461847	-0.0264742	0.0164706	-0.0215725	0.0213723
	Acute_confusion	0.198249	-0.15296	0.0405405	-0.0050558	0.188444	0.104242	0.297742	-0.084466	0.109034	-0.0348657	0.158635	-0.101736	0.0917647	-0.0573923	0.136108
	Slurring_words	0.172329	-0.130935	0.036036	-0.00430398	0.162667	0.0870275	0.253998	-0.0953196	0.0716511	0.00371208	0.170683	-0.0869707	0.08	-0.0544847	0.112486
	Constipation	0.262347	-0.18159	0.0765766	-0.0323884	0.225778	0.105427	0.363594	-0.0743655	0.183801	0.0249664	0.283133	-0.101696	0.156471	-0.0556915	0.202475
	Diarrhea	0.555692	-0.326093	0.225225	0.0451263	0.596444	0.128832	0.680151	-0.0777979	0.47352	0.00289868	0.554217	-0.161906	0.389412	-0.102499	0.448819
	Vomiting	0.151138	-0.0913337	0.0585586	0.0234411	0.173333	0.0650654	0.214958	-0.0221664	0.127726	-0.0274023	0.12249	-0.0863628	0.0635294	-0.0565289	0.0933633
	Nausea	0.471278	-0.346819	0.117117	0.029397	0.493333	0.155537	0.619473	-0.130603	0.333333	-0.00811304	0.455823	-0.183936	0.28	-0.0949824	0.368954
	Loss_of_appetite	0.504203	-0.30089	0.198198	0.0235786	0.522667	0.142492	0.64158	-0.0909884	0.4081	-0.0171603	0.481928	-0.180265	0.318824	-0.0806404	0.418448
	Acid_reflux	0.34641	-0.197093	0.144144	-0.000792498	0.340444	0.11596	0.457197	-0.0920158	0.249221	0.0101687	0.351406	-0.130649	0.210588	-0.0746453	0.266592
	Dry_cough	0.635201	-0.329575	0.306306	0.0112298	0.647111	0.0743727	0.710254	0.0120938	0.647975	0.00468097	0.640562	-0.0570578	0.578824	-0.062203	0.573678
	Cough_with_mucus	0.293695	-0.0657713	0.225225	-0.00655207	0.284444	0.0735378	0.364534	-0.0480059	0.242991	-0.0219202	0.269076	-0.0733495	0.217647	-0.0514015	0.239595
	Coughing_up_blood	0.0483363	-0.0253966	0.0225225	0.00274758	0.0506667	0.0216952	0.0696143	-0.00742064	0.0404984	-0.00976647	0.0381526	-0.0173308	0.0305882	-0.024297	0.023622
	Shortness_of_breath	0.737653	-0.362986	0.373874	0.0178071	0.754667	0.0839307	0.82079	-0.0141181	0.722741	0.0422569	0.779116	-0.0733301	0.663529	-0.0810665	0.655793
	Tightness_of_chest	0.681261	-0.373846	0.306306	0.0318475	0.712	0.0950121	0.775165	-0.0197164	0.660436	0.0106105	0.690763	-0.0989761	0.581176	-0.0783528	0.6018
	Sneezing	0.278459	-0.0885702	0.184685	0.0227452	0.296	0.0926906	0.365945	-0.0925695	0.180685	-0.0624115	0.210843	-0.107372	0.165882	-0.0572818	0.215973
	Runny_nose	0.332224	-0.039518	0.288288	0.0117492	0.339556	0.0917609	0.419567	-0.0785852	0.249221	-0.0687702	0.259036	-0.0936887	0.234118	-0.0679638	0.259843
	Pain_burning_chest	0.474781	-0.270187	0.202703	0.0275544	0.500444	0.105191	0.578081	-0.0336377	0.439252	-0.00100252	0.471888	-0.115243	0.357647	-0.0960622	0.376828
	Rattling_breath	0.178634	-0.102857	0.0720721	0.0179594	0.192889	0.0607243	0.235654	-0.0658953	0.109034	-0.014287	0.160643	-0.0714001	0.103529	-0.0421961	0.132733
	Sore_throat	0.556567	-0.41668	0.135135	0.0330733	0.584889	0.114224	0.66604	-0.0845259	0.46729	0.0124414	0.564257	-0.101227	0.450588	-0.0906233	0.461192
	Respiratory_other	0.0868651	-0.000469795	0.0855856	0.0348335	0.120889	0.00989946	0.0959548	-0.0144043	0.0716511	-0.0338465	0.0522088	-0.0213495	0.0647059	-0.0230633	0.0629921
	Hearing_loss	0.0991243	-0.0789808	0.018018	-0.00722106	0.0897778	0.0365854	0.133584	-0.0378088	0.05919	0.0054108	0.10241	-0.0393518	0.0576471	-0.0103847	0.0866142
	Tinnitus	0.34641	-0.268999	0.0720721	-0.02196	0.319111	0.106248	0.447319	-0.0949652	0.246106	0.00631843	0.34739	-0.124601	0.216471	-0.00923761	0.331834
	Eye_vision_symptoms	0.351839	-0.256784	0.0900901	-0.0197634	0.327111	0.139485	0.486359	-0.0883075	0.258567	-0.00550902	0.341365	-0.13158	0.215294	-0.0836574	0.263217
	Reproductive_all_menstrual_issues	0.184764	-0.0934616	0.0900901	-0.0119961	0.171556	0.0695057	0.253057	-0.0215579	0.161994	0.00921943	0.192771	-0.0717869	0.111765	-0.0564425	0.127109
	Bladder_control	0.161471	-0.107307	0.0495495	-0.0128562	0.144	0.080679	0.237535	-0.0820899	0.0747664	-0.0283422	0.128514	-0.0697974	0.0870588	-0.0376211	0.119235
	Peeling_skin	0.126795	-0.0809705	0.045045	0.00109552	0.127111	0.0569571	0.182973	-0.0138661	0.11215	-0.0135658	0.11245	-0.0648391	0.0611765	-0.042776	0.0832396
	Petechiae	0.166375	-0.0910849	0.0720721	-0.0102681	0.152889	0.0851967	0.248354	-0.057238	0.105919	-0.0185787	0.144578	-0.0784511	0.0847059	-0.0619197	0.101237
	Covid_toes	0.128897	-0.0704416	0.0585586	0.0203332	0.149333	0.0455059	0.174506	0.00184096	0.130841	-0.0245825	0.104418	-0.0619413	0.0670588	-0.0446357	0.0843645
	Dermatographia	0.0812609	-0.0398773	0.0405405	-0.00752895	0.0728889	0.0489331	0.129351	-0.0149973	0.0654206	-0.0221849	0.0582329	-0.0451237	0.0352941	-0.0365483	0.0438695
	Skin_rashes	0.267075	-0.123501	0.13964	0.0266373	0.289778	0.093868	0.357008	-0.069994	0.193146	-0.0121364	0.251004	-0.118435	0.144706	-0.0820381	0.181102
	Skin_Allergy_other	0.0956217	-0.072155	0.0225225	0.0102114	0.104889	0.0327919	0.127469	-0.0167959	0.0778816	-0.0264044	0.0682731	-0.0346775	0.06	-0.0193119	0.0753656
	Muscle_spasms	0.340981	-0.275549	0.0585586	0.00811511	0.342222	0.131086	0.465193	-0.122269	0.211838	-0.00679788	0.327309	-0.157637	0.176471	-0.0562668	0.27784
	Muscle_aches	0.680385	-0.614105	0.0630631	0.0499431	0.727111	0.125278	0.802446	-0.0572303	0.619938	-0.000461138	0.676707	-0.108933	0.568235	-0.0843671	0.592801
	Joint_pain	0.553415	-0.443238	0.103604	0.0149365	0.561778	0.141305	0.688147	-0.116935	0.429907	0.0294639	0.576305	-0.149194	0.397647	-0.077775	0.469066
	Bone_ache_burning	0.256567	-0.192312	0.0585586	-0.00109272	0.249778	0.115545	0.366416	-0.101338	0.149533	-0.00589058	0.24498	-0.109694	0.141176	-0.0821416	0.168729
	Inability_to_yawn	0.0549912	-0.0315315	0.0225225	-0.00160961	0.0524444	0.0188528	0.0729069	-0.0166709	0.0373832	0.000162813	0.0542169	-0.0258188	0.0282353	-0.00456024	0.0494938
	Difficulty_swallowing	0.30718	-0.206489	0.0990991	-0.00603224	0.299556	0.102691	0.408278	-0.0283292	0.277259	0.0458178	0.351406	-0.125588	0.18	-0.0817408	0.223847
	Changes_in_voice	0.25289	-0.115404	0.135135	0.00368334	0.254222	0.0805994	0.331138	-0.0418161	0.208723	0.0346017	0.285141	-0.102304	0.148235	-0.0750608	0.175478
	Extreme_thirst	0.331524	-0.273255	0.0540541	0.0166911	0.344	0.13271	0.460019	-0.0749725	0.252336	-0.0100398	0.317269	-0.164956	0.162353	-0.0798398	0.247469
	Ear_sensitivity_to_noise	0.356567	-0.279113	0.0720721	-0.0187411	0.332444	0.134703	0.485889	-0.0957338	0.255452	0.0363647	0.38755	-0.14295	0.208235	-0.0778447	0.273341
	Ear_ear_pain	0.250788	-0.179323	0.0675676	0.00110894	0.248	0.112469	0.35936	-0.069321	0.17757	-0.0119513	0.23494	-0.123362	0.123529	-0.0759124	0.170979
	Ear_changes_to_ear_canal	0.218389	-0.120958	0.0945946	0.0022248	0.217778	0.0845411	0.300094	-0.0504439	0.165109	0.00131449	0.216867	-0.108494	0.107059	-0.0535732	0.16198
	Ear_numbness	0.0509632	-0.0449069	0.0045045	-0.00318915	0.0462222	0.0314917	0.0809031	-0.0276045	0.0218069	-0.00523467	0.0441767	-0.0294114	0.02	-0.0190402	0.0303712
	Other_ear_hearing_symptoms	0.209282	-0.14887	0.0585586	-0.010095	0.197333	0.0625623	0.269991	-0.0329735	0.174455	-0.0126492	0.194779	-0.0686048	0.138824	-0.0150773	0.192351
	Eye_Vision_blurred_vision	0.377058	-0.249461	0.121622	-0.0137494	0.357333	0.150554	0.521637	-0.106285	0.264798	0.0064273	0.37751	-0.146377	0.224706	-0.105616	0.265467
	Eye_Vision_sensitivity_to_light	0.318214	-0.250815	0.0630631	-0.00543385	0.308444	0.13203	0.445908	-0.0771182	0.23676	0.0274872	0.341365	-0.137408	0.176471	-0.102405	0.211474
	Eye_Vision_dry_eyes	0.291944	-0.229288	0.0585586	0.00370943	0.291556	0.0983251	0.386171	-0.0728929	0.214953	-0.0047136	0.283133	-0.124317	0.163529	-0.0347528	0.253093
	Eye_Vision_eye_pressure_pain	0.265149	-0.178246	0.0810811	-0.0264379	0.232889	0.129196	0.388523	-0.103564	0.155763	-0.018363	0.240964	-0.12168	0.137647	-0.0669759	0.192351
	Eye_Vision_floaters	0.20648	-0.172415	0.0315315	-0.0101685	0.193778	0.0909738	0.29492	-0.0450678	0.158879	0.00288103	0.206827	-0.093358	0.110588	-0.0577146	0.146232
	Eye_Vision_double_vision	0.0810858	-0.0570663	0.0225225	-0.0066999	0.0728889	0.0398844	0.119473	-0.0266293	0.0529595	0.0107727	0.0903614	-0.0490006	0.0305882	-0.022221	0.0573678
	Eye_Vision_tunnel_vision	0.0397548	-0.0292931	0.00900901	-0.00896877	0.0293333	0.0256678	0.0639699	-0.025841	0.0124611	-0.00416556	0.0341365	-0.0253609	0.0129412	-0.00680604	0.0314961
	Eye_Vision_loss_of_vision	0.0117338	-0.0111093	0	0.000446287	0.0115556	0.00582394	0.0169332	-0.0111093	0	0.00495499	0.0160643	-0.00522692	0.00588235	-0.00548497	0.0056243
	Eye_Vision_pink_eye	0.129772	-0.0864699	0.0405405	0.0205451	0.147556	0.037618	0.164628	-0.0491288	0.0778816	-0.0165687	0.110442	-0.043481	0.0835294	-0.0257731	0.101237
	Eye_Vision_bloodshot_eyes	0.144834	-0.0870502	0.0540541	0.00200682	0.143111	0.0583313	0.199436	-0.0663379	0.0747664	0.0275704	0.168675	-0.0681631	0.0729412	-0.0466161	0.0944882
	Eye_Vision_redness_outside_eye	0.0845884	-0.0517051	0.0315315	0.00920783	0.0924444	0.0367069	0.119944	-0.0240466	0.05919	-0.0149635	0.0682731	-0.049119	0.0341176	-0.0224942	0.0607424
	Eye_Vision_seeing_things_peripheral_vision	0.138179	-0.106616	0.027027	-0.0198651	0.113778	0.0784926	0.212135	-0.0806833	0.0529595	-0.00111272	0.13253	-0.0618781	0.0717647	-0.0470287	0.0866142
	Eye_Vision_other_eye_issues	0.254466	-0.152269	0.0990991	0.0144098	0.265778	0.0684816	0.319849	-0.0551063	0.196262	-0.0304844	0.220884	-0.0701915	0.181176	-0.0398944	0.211474
	Reproductive_early_menopause	0.0143608	0.00408998	0.018018	-0.000594705	0.0133333	0.00817921	0.0221072	-0.00769751	0.00623053	-0.00388788	0.0100402	-0.0103986	0.00352941	-0.00492916	0.00899888
	Reproductive_abnormally_heavy_periods_clotting	0.0971979	-0.0548002	0.0405405	-0.00200741	0.0933333	0.0467101	0.142051	-0.0330354	0.0623053	-0.0130114	0.0823293	-0.0482819	0.0470588	-0.0300989	0.0652418
	Reproductive_testicle_penis_pain_changes	0.0366025	-0.00945117	0.027027	-0.00625597	0.0302222	0.00303262	0.0395108	-0.00221028	0.0342679	-0.00836575	0.0281124	-0.00588996	0.0305882	0.0141405	0.0506187
	Reproductive_sexual_dysfunction	0.115587	-0.0768806	0.036036	-0.0240277	0.0888889	0.0451267	0.158043	-0.047496	0.0654206	-0.0305873	0.0823293	-0.0246813	0.0882353	-0.000430658	0.112486
	Reproductive_postmenopausal_bleeding	0.0168126	-0.0115791	0.0045045	-0.00186135	0.0142222	0.00602368	0.0221072	-0.0129683	0.00311526	0.00600479	0.0220884	-0.00549533	0.0105882	-0.00258526	0.0134983
	Reproductive_other_urinary_issues	0.156918	-0.090477	0.0630631	-0.0113178	0.142222	0.0647102	0.21825	-0.0600821	0.0934579	-0.0069537	0.146586	-0.0711871	0.0823529	-0.0241812	0.129359
	Reproductive_other_menstrual_issues	0.0903678	-0.0314763	0.0585586	0.00329851	0.0933333	0.023794	0.113829	-0.00592267	0.0841121	-0.0197537	0.0702811	-0.0170936	0.0729412	-0.0236681	0.0663667
	Reproductive_abnormally_irregular_periods	0.121016	-0.0666556	0.0540541	-0.014043	0.106667	0.0439187	0.164628	-0.00544487	0.115265	0.0218606	0.14257	-0.0536508	0.0670588	-0.0295961	0.0911136
	Gastrointestinal_feeling_full_quickly_eating	0.314711	-0.177251	0.135135	-0.0154971	0.296889	0.0996554	0.412041	-0.041358	0.271028	0.0289795	0.341365	-0.112386	0.2	-0.0682915	0.244094
	Gastrointestinal_abdominal_pain	0.418914	-0.269054	0.144144	0.023246	0.436444	0.143246	0.556444	-0.101672	0.311526	0.0305766	0.443775	-0.208493	0.204706	-0.0858644	0.327334
	Gastrointestinal_hyperactive_bowel	0.242732	-0.125988	0.112613	0.00228833	0.240889	0.096771	0.335372	-0.0734915	0.165109	0.00437132	0.242972	-0.116248	0.122353	-0.0676219	0.170979
	SkinAllergy_itchy_skin	0.324869	-0.178716	0.13964	0.0212004	0.339556	0.12379	0.442145	-0.115863	0.202492	-0.0151423	0.303213	-0.16659	0.151765	-0.0686364	0.249719
	SkinAllergy_itchy_eyes	0.249912	-0.163986	0.0810811	0.0162662	0.261333	0.0954785	0.340546	-0.0861886	0.158879	-0.0181595	0.226908	-0.102714	0.142353	-0.0684642	0.176603
	SkinAllergy_heighted_reaction_allergies	0.126445	-0.0653015	0.0585586	-0.00563783	0.118222	0.0487646	0.172625	-0.0459784	0.0778816	-0.00940223	0.114458	-0.0450365	0.0788235	-0.028247	0.095613
	SkinAllergy_brittle_nail	0.111033	-0.059885	0.0495495	-0.0249901	0.0844444	0.0533124	0.162747	-0.0284377	0.0809969	0.00502324	0.114458	-0.0459052	0.0635294	-0.0295696	0.079865
	SkinAllergy_other_itchy	0.0581436	-0.0213342	0.036036	-0.000481365	0.0568889	0.0225921	0.0799624	-0.0137565	0.0436137	-0.0131935	0.0441767	-0.0208997	0.0364706	-0.0157505	0.0416198
	SkinAllergy_shingles	0.0259194	-0.021196	0.0045045	-0.00170055	0.024	0.0109881	0.0366886	-0.00389369	0.0218069	0.00040387	0.0261044	-0.00922996	0.0164706	-0.00882766	0.0168729
	PEM	0.881961	-0.397115	0.486486	0.0106208	0.894222	0.0552509	0.938852	0.0291712	0.912773	0.0320613	0.915663	-0.0506602	0.832941	-0.0264585	0.857143
	Fatigue	0.979335	-0.173133	0.806306	0.00900488	0.988444	0.0125642	0.992004	0.00186885	0.981308	0.0165444	0.995984	-0.00532192	0.974118	-0.00306161	0.976378
	Change_sensitivity_to_meds	0.211208	-0.0918035	0.117117	-0.0071428	0.201778	0.0761218	0.285042	-0.0406963	0.168224	0.00393083	0.212851	-0.0936265	0.115294	-0.0480657	0.160855
	New_allergies	0.111909	-0.0660476	0.045045	1.84233e-05	0.111111	0.0493024	0.160395	-0.0145195	0.0965732	-0.00868305	0.10241	-0.0628574	0.0482353	-0.0312277	0.079865
