# Supplementary material for: Multi-method phenotyping of Long COVID patients using high-dimensional symptom data
Source: Research Square preprint supplement (doi:10.21203/rs.3.rs-4901463/v1), 2024-10-02
Supplement: Supplementary file 2 [file 02d739f545a637c741212105.xlsx]

## Sheet: Cluster 0
variable	difference from others	absolute values
Symptom_PEM	0.0507182	0.931885
Symptom_Memory_short	-0.00887305	0.918317
Symptom_Insomnia	0.218484	0.888433
Symptom_Cognitive_Functioning_attentionconcentration	0.105479	0.857319
Symptom_Shortness_of_breath	0.0939348	0.830149
Symptom_Tightness_of_chest	0.0805753	0.76685
Symptom_Cognitive_Functioning_thinking	0.0698185	0.743198
Symptom_Dizziness_vertigo	0.0470899	0.732094
Symptom_Muscle_aches	0.0355974	0.724305
Symptom_Elevated_temp	0.148532	0.702906
Symptom_Dry_cough	0.0599085	0.699374
Symptom_Heart_palpitations	0.00653452	0.677824
Symptom_Diarrhea	0.0923973	0.653919
Symptom_Cognitive_Functioning_executive	0.0339693	0.63478
Symptom_Sleep_other	0.0981835	0.629227
Symptom_Gasping_air_normal_oxygen	0.0488296	0.625956
Symptom_Sore_throat	0.0626227	0.622684
Symptom_Waking_up_in_night	0.146606	0.622473
Symptom_Chills_flushing_sweats	0.0620683	0.622377
Symptom_Loss_of_appetite	0.0872955	0.6005
Symptom_Tachycardia	-0.0201489	0.590105
Symptom_Cognitive_Functioning_problemsolving	0.0112335	0.583648
Symptom_Joint_pain	-0.0251204	0.5476
Symptom_Nausea	0.0400104	0.525272
Symptom_Night_sweats	0.105507	0.519517
Symptom_Temp_lability	0.111653	0.50129
Symptom_Pain_burning_chest	-0.00773209	0.487717
Symptom_Difficulty_falling_asleep	0.077186	0.486166
Symptom_Headaches_behind_eyes	0.0355397	0.45829
Symptom_Gastrointestinal_abdominal_pain	0.014529	0.456594
Symptom_Loss_of_smell	0.039756	0.441452
Symptom_Fever	0.140825	0.441312
Symptom_Headaches_stiff_neck	0.0143555	0.439529
Symptom_Headaches_temples	0.070695	0.43214
Symptom_Loss_of_taste	0.0548668	0.423298
Symptom_Vivid_dreams	0.0818119	0.413275
Symptom_Awakened_cannot_breathe	0.065223	0.411089
Symptom_Sensations_weakness	-0.102913	0.393874
Symptom_Headaches_diffuse	0.0100944	0.372742
Symptom_Runny_nose	0.0292559	0.371513
Symptom_Acid_reflux	0.00622882	0.369313
Symptom_Cognitive_Functioning_slowedthoughts	-0.093543	0.36398
Symptom_Merged_temperature_other_temp_issues	-0.052872	0.363112
Symptom_Sensations_tingling_prickling	-0.176769	0.350235
Symptom_Cough_with_mucus	0.0294659	0.331519
Symptom_Extreme_thirst	-0.026916	0.32965
Symptom_Gastrointestinal_feeling_full_quickly_eating	-0.0134746	0.324381
Symptom_Memory_long	-0.128469	0.31922
Symptom_Sensations_skin_burning_no_rash	-0.196624	0.314033
Symptom_Sneezing	0.0138275	0.30924
Symptom_Nightmares	0.0390544	0.296611
Symptom_Altered_taste	-0.00725872	0.294896
Symptom_Vibrating_sensations	-0.164368	0.293808
Symptom_Headaches_brain_pressure	-0.0901539	0.284384
Symptom_Headaches_base_of_skull	-0.0236461	0.283654
Symptom_Tremors	-0.166804	0.282599
Symptom_Waking_up_early	0.0261587	0.280046
Symptom_Headaches_after_mental_exertion	-0.017996	0.278657
Symptom_Difficulty_swallowing	-0.0736265	0.269762
Symptom_Ear_sensitivity_to_noise	-0.126655	0.267599
Symptom_Sensations_coldness	-0.132066	0.266061
Symptom_Headaches_migraines	-0.00224247	0.263293
Symptom_Tinnitus	-0.11723	0.261456
Symptom_Heat_intolerance	-0.0504601	0.257929
Symptom_Gastrointestinal_hyperactive_bowel	-0.00956023	0.254593
Symptom_Sensations_numbness_loss_sensation	-0.175405	0.237335
Symptom_Altered_smell	-0.0162608	0.234075
Symptom_Eye_Vision_blurred_vision	-0.197395	0.227846
Symptom_Eye_Vision_sensitivity_to_light	-0.140401	0.227567
Symptom_Phantom_smell	-0.0545486	0.226127
Symptom_Constipation	-0.0604304	0.225632
Symptom_SkinAllergy_itchy_skin	-0.151576	0.217105
Symptom_Eye_Vision_dry_eyes	-0.115191	0.21545
Symptom_Muscle_spasms	-0.177674	0.207221
Symptom_Changes_in_voice	-0.0765384	0.204065
Symptom_Skin_rashes	-0.101186	0.201238
Symptom_Eye_vision_symptoms	-0.207191	0.192908
Symptom_Bone_ache_burning	-0.0983829	0.191254
Symptom_Cognitive_Functioning_fastthoughts	0.000467695	0.187114
Symptom_Lucid_dreams	0.0131601	0.184642
Symptom_Restless_leg	-0.0272234	0.179019
Symptom_Eye_Vision_eye_pressure_pain	-0.126681	0.17635
Symptom_Rattling_breath	-0.0215085	0.174815
Symptom_Vomiting	0.00895276	0.174588
Symptom_SkinAllergy_itchy_eyes	-0.118889	0.172401
Symptom_Ear_ear_pain	-0.119723	0.170237
Symptom_Eye_Vision_other_eye_issues	-0.114773	0.167437
Symptom_Change_sensitivity_to_meds	-0.0755035	0.159283
Symptom_Acute_confusion	-0.0670069	0.158894
Symptom_Neuralgia	-0.209026	0.15829
Symptom_Reproductive_all_menstrual_issues	-0.0467076	0.15729
Symptom_Ear_changes_to_ear_canal	-0.101239	0.151892
Symptom_Low_temp	-0.0780001	0.148894
Symptom_Eye_Vision_floaters	-0.0928987	0.145755
Symptom_Other_ear_hearing_symptoms	-0.0913016	0.145621
Symptom_Sleep_apnea	-0.0120662	0.127885
Symptom_Reproductive_abnormally_irregular_periods	-0.0207149	0.112727
Symptom_Bradycardia	-0.0805003	0.107701
Symptom_Fainting	-0.0525259	0.101079
Symptom_Eye_Vision_bloodshot_eyes	-0.0689172	0.101058
Symptom_Headaches_brain_warmth	-0.0424716	0.100394
Symptom_Headaches_other	-0.0495274	0.0986518
Symptom_Reproductive_other_urinary_issues	-0.0810197	0.0978127
Symptom_Petechiae	-0.109461	0.0923268
Symptom_Reproductive_abnormally_heavy_periods_clotting	-0.0151414	0.0912205
Symptom_Reproductive_sexual_dysfunction	-0.0448678	0.0895205
Symptom_SkinAllergy_heighted_reaction_allergies	-0.0617916	0.0849843
Symptom_Eye_Vision_pink_eye	-0.062509	0.0841779
Symptom_Sensations_electrical_zaps	-0.222202	0.0831147
Symptom_Eye_Vision_seeing_things_peripheral_vision	-0.0848794	0.0815925
Symptom_Covid_toes	-0.0803027	0.0795469
Symptom_Reproductive_other_menstrual_issues	-0.0185387	0.0794319
Symptom_Peeling_skin	-0.0770418	0.0794246
Symptom_Bladder_control	-0.115449	0.0779471
Symptom_Phantom_taste	-0.0467731	0.0776956
Symptom_Skin_Allergy_other	-0.0262846	0.076208
Symptom_Hallucinations_visual	-0.0530194	0.0741813
Symptom_Memory_forget_tasks	-0.0947269	0.0733821
Symptom_Respiratory_other	-0.0242926	0.0688003
Symptom_Bulging_veins	-0.139214	0.0651968
Symptom_New_allergies	-0.074151	0.0594344
Symptom_Heightened_smell	-0.0437262	0.0564556
Symptom_Speech_difficulty_finding_words	-0.49372	0.0531458
Symptom_Eye_Vision_redness_outside_eye	-0.0621386	0.0476991
Symptom_Memory_other	-0.087621	0.0471568
Symptom_Hearing_loss	-0.0777539	0.0437868
Symptom_SkinAllergy_brittle_nail	-0.099615	0.0434526
Symptom_Sensations_numbness_one_sided_weakness	-0.11501	0.0434478
Symptom_Cognitive_Functioning_other	-0.0562707	0.0415396
Symptom_Memory_no_new_memories	-0.0686469	0.0402938
Symptom_Hallucinations_auditory	-0.057098	0.0387322
Symptom_SkinAllergy_other_itchy	-0.0296269	0.0386053
Symptom_Cognitive_Functioning_agnosia	-0.0973744	0.037445
Symptom_Sensations_facial_pressure_other	-0.0368328	0.037264
Symptom_Slurring_words	-0.176711	0.0335546
Symptom_Dermatographia	-0.0818634	0.0265684
Symptom_Inability_to_yawn	-0.042255	0.023241
Symptom_Sensations_facial_pressure_right	-0.0715442	0.0171213
Symptom_Sensations_facial_pressure_left	-0.0895581	0.0160366
Symptom_Eye_Vision_double_vision	-0.0957995	0.0160329
Symptom_Speech_difficulty_speaking_complete_sentences	-0.2754	0.00401146
Symptom_Speech_difficulty_communicating_verbally	-0.353918	0.00334992
Symptom_Speech_speaking_unrecognizable_words	-0.121302	0.0030403
Symptom_Speech_difficulty_reading_processing_text	-0.311047	0.00107949
Symptom_Speech_changes_to_secondary_languages	-0.0675142	0.000914498
Symptom_Speech_difficulty_communicating_writing	-0.211485	1e-15
Symptom_Speech_difficulty_understanding_others_speech	-0.313223	1e-15

## Sheet: Cluster 1
variable	1-dif	1-abs
Symptom_Eye_Vision_sensitivity_to_light	0.668781	0.974504
Symptom_Difficulty_swallowing	0.603389	0.894699
Symptom_SkinAllergy_itchy_eyes	0.59998	0.835973
Symptom_SkinAllergy_itchy_skin	0.598828	0.909785
Symptom_Muscle_spasms	0.594992	0.920452
Symptom_Speech_difficulty_reading_processing_text	0.59174	0.834421
Symptom_Ear_ear_pain	0.583267	0.819151
Symptom_Speech_difficulty_understanding_others_speech	0.582207	0.826551
Symptom_Sensations_numbness_loss_sensation	0.581538	0.936052
Symptom_Slurring_words	0.567792	0.720788
Symptom_Sensations_coldness	0.564011	0.908594
Symptom_Ear_sensitivity_to_noise	0.563112	0.904307
Symptom_Tremors	0.561661	0.955029
Symptom_Speech_difficulty_communicating_writing	0.560661	0.71275
Symptom_Gastrointestinal_abdominal_pain	0.554875	0.955375
Symptom_Skin_rashes	0.554844	0.806804
Symptom_Sensations_electrical_zaps	0.553639	0.799275
Symptom_Acute_confusion	0.551001	0.729363
Symptom_Eye_Vision_eye_pressure_pain	0.545163	0.796514
Symptom_Neuralgia	0.544324	0.85369
Symptom_Vibrating_sensations	0.535182	0.939546
Symptom_Petechiae	0.533467	0.685798
Symptom_Ear_changes_to_ear_canal	0.53248	0.736864
Symptom_Eye_Vision_blurred_vision	0.532231	0.901348
Symptom_Sensations_skin_burning_no_rash	0.528897	0.983745
Symptom_Eye_vision_symptoms	0.528426	0.871939
Symptom_Speech_difficulty_speaking_complete_sentences	0.525716	0.743503
Symptom_Bone_ache_burning	0.524524	0.766245
Symptom_Night_sweats	0.518505	0.900746
Symptom_Phantom_smell	0.515799	0.752601
Symptom_Eye_Vision_dry_eyes	0.515373	0.797508
Symptom_Headaches_brain_pressure	0.512761	0.84092
Symptom_Speech_difficulty_communicating_verbally	0.512549	0.803165
Symptom_Tinnitus	0.511258	0.841599
Symptom_Heat_intolerance	0.508119	0.77354
Symptom_Awakened_cannot_breathe	0.501827	0.814108
Symptom_Headaches_after_mental_exertion	0.498862	0.755757
Symptom_Nausea	0.4899	0.940555
Symptom_Low_temp	0.485923	0.669438
Symptom_Extreme_thirst	0.485013	0.802199
Symptom_Bulging_veins	0.481418	0.638088
Symptom_Nightmares	0.475809	0.699768
Symptom_Sneezing	0.475632	0.735521
Symptom_Bladder_control	0.475263	0.62322
Symptom_Headaches_migraines	0.469537	0.698781
Symptom_Speech_difficulty_finding_words	0.467031	0.939992
Symptom_Sensations_weakness	0.466893	0.919849
Symptom_SkinAllergy_brittle_nail	0.464802	0.564453
Symptom_Sensations_tingling_prickling	0.464422	0.942104
Symptom_Eye_Vision_seeing_things_peripheral_vision	0.460712	0.585215
Symptom_Loss_of_appetite	0.46018	0.944702
Symptom_Gastrointestinal_hyperactive_bowel	0.458412	0.686567
Symptom_Headaches_stiff_neck	0.456436	0.847604
Symptom_Gastrointestinal_feeling_full_quickly_eating	0.45202	0.754068
Symptom_Acid_reflux	0.449128	0.778143
Symptom_Memory_forget_tasks	0.44586	0.572385
Symptom_Memory_long	0.445436	0.848978
Symptom_Eye_Vision_floaters	0.441562	0.639104
Symptom_Difficulty_falling_asleep	0.440115	0.821177
Symptom_Headaches_base_of_skull	0.439347	0.711033
Symptom_Vivid_dreams	0.438467	0.742495
Symptom_Headaches_behind_eyes	0.436435	0.828347
Symptom_Changes_in_voice	0.433084	0.674486
Symptom_Chills_flushing_sweats	0.429674	0.961705
Symptom_Phantom_taste	0.427921	0.515875
Symptom_Eye_Vision_double_vision	0.426749	0.498386
Symptom_Peeling_skin	0.426261	0.544012
Symptom_Pain_burning_chest	0.426219	0.888287
Symptom_Altered_taste	0.417033	0.68655
Symptom_Temp_lability	0.416503	0.782689
Symptom_Altered_smell	0.41347	0.63075
Symptom_Fainting	0.410877	0.528835
Symptom_Headaches_diffuse	0.410442	0.742293
Symptom_Constipation	0.409533	0.659444
Symptom_Joint_pain	0.407983	0.947387
Symptom_Covid_toes	0.403523	0.526155
Symptom_Cognitive_Functioning_slowedthoughts	0.39892	0.818561
Symptom_Headaches_temples	0.3942	0.73076
Symptom_Merged_temperature_other_temp_issues	0.3929	0.774593
Symptom_Other_ear_hearing_symptoms	0.392429	0.592141
Symptom_Cognitive_Functioning_problemsolving	0.392022	0.935144
Symptom_Diarrhea	0.389234	0.927922
Symptom_Hallucinations_auditory	0.388089	0.449674
Symptom_Hallucinations_visual	0.387891	0.481175
Symptom_Cognitive_Functioning_executive	0.387476	0.961093
Symptom_Cognitive_Functioning_agnosia	0.384821	0.482548
Symptom_Speech_speaking_unrecognizable_words	0.384288	0.469738
Symptom_Waking_up_in_night	0.381768	0.839546
Symptom_Eye_Vision_bloodshot_eyes	0.379099	0.514612
Symptom_Dermatographia	0.375218	0.44849
Symptom_Eye_Vision_redness_outside_eye	0.369921	0.446523
Symptom_Rattling_breath	0.36978	0.536004
Symptom_Change_sensitivity_to_meds	0.365603	0.566458
Symptom_Headaches_brain_warmth	0.364621	0.476172
Symptom_Elevated_temp	0.359439	0.89759
Symptom_Runny_nose	0.352674	0.670053
Symptom_Tachycardia	0.34744	0.929418
Symptom_Bradycardia	0.347362	0.502651
Symptom_Sensations_facial_pressure_left	0.345312	0.417455
Symptom_Waking_up_early	0.344633	0.574022
Symptom_Cognitive_Functioning_thinking	0.343597	0.995917
Symptom_Eye_Vision_other_eye_issues	0.340115	0.587333
Symptom_Hearing_loss	0.339641	0.429074
Symptom_SkinAllergy_heighted_reaction_allergies	0.336443	0.452586
Symptom_Reproductive_sexual_dysfunction	0.333626	0.438899
Symptom_Sensations_numbness_one_sided_weakness	0.330886	0.455045
Symptom_Lucid_dreams	0.324655	0.472175
Symptom_Sleep_other	0.324317	0.837966
Symptom_Sore_throat	0.322136	0.862235
Symptom_Vomiting	0.321097	0.462721
Symptom_Cough_with_mucus	0.32062	0.600277
Symptom_Reproductive_other_urinary_issues	0.320522	0.468467
Symptom_Restless_leg	0.315588	0.49546
Symptom_Fever	0.311103	0.598492
Symptom_Reproductive_all_menstrual_issues	0.310805	0.487302
Symptom_Loss_of_taste	0.310712	0.659463
Symptom_Dizziness_vertigo	0.307824	0.972772
Symptom_Memory_no_new_memories	0.306123	0.386235
Symptom_Muscle_aches	0.305231	0.973197
Symptom_Insomnia	0.303424	0.966839
Symptom_Sleep_apnea	0.300505	0.416412
Symptom_Gasping_air_normal_oxygen	0.299088	0.856964
Symptom_New_allergies	0.291784	0.397221
Symptom_Heightened_smell	0.282124	0.35724
Symptom_Tightness_of_chest	0.273627	0.945051
Symptom_Cognitive_Functioning_fastthoughts	0.271845	0.437616
Symptom_Heart_palpitations	0.271404	0.92232
Symptom_Sensations_facial_pressure_right	0.267533	0.330115
Symptom_Loss_of_smell	0.261141	0.645807
Symptom_Cognitive_Functioning_attentionconcentration	0.254094	0.994502
Symptom_Shortness_of_breath	0.230871	0.956552
Symptom_Reproductive_abnormally_irregular_periods	0.215435	0.330712
Symptom_Eye_Vision_pink_eye	0.210809	0.336472
Symptom_Dry_cough	0.208651	0.836675
Symptom_Headaches_other	0.188067	0.31797
Symptom_Reproductive_abnormally_heavy_periods_clotting	0.183968	0.275014
Symptom_Sensations_facial_pressure_other	0.177908	0.235486
Symptom_SkinAllergy_other_itchy	0.162626	0.21607
Symptom_Speech_changes_to_secondary_languages	0.15188	0.203433
Symptom_Inability_to_yawn	0.149525	0.200268
Symptom_Reproductive_other_menstrual_issues	0.1283	0.214976
Symptom_PEM	0.113061	0.989433
Symptom_Cognitive_Functioning_other	0.111069	0.196007
Symptom_Memory_other	0.103044	0.223155
Symptom_Skin_Allergy_other	0.066048	0.161438
Symptom_Memory_short	0.0631383	0.984789
Symptom_Respiratory_other	0.0600909	0.146693

## Sheet: Cluster 2
variable	2-dif	2-abs
Symptom_Speech_difficulty_finding_words	0.522897	0.991561
Symptom_PEM	0.0941581	0.971984
Symptom_Cognitive_Functioning_attentionconcentration	0.225901	0.968478
Symptom_Cognitive_Functioning_thinking	0.313414	0.968056
Symptom_Cognitive_Functioning_executive	0.382978	0.956942
Symptom_Memory_short	0.0299864	0.954187
Symptom_Cognitive_Functioning_problemsolving	0.358637	0.904328
Symptom_Dizziness_vertigo	0.166461	0.842283
Symptom_Muscle_aches	0.123473	0.805421
Symptom_Memory_long	0.378661	0.787341
Symptom_Heart_palpitations	0.118041	0.780753
Symptom_Insomnia	0.0996666	0.778755
Symptom_Speech_difficulty_communicating_verbally	0.485841	0.778511
Symptom_Speech_difficulty_understanding_others_speech	0.482867	0.734853
Symptom_Cognitive_Functioning_slowedthoughts	0.272755	0.702101
Symptom_Sensations_skin_burning_no_rash	0.208603	0.68809
Symptom_Joint_pain	0.126816	0.687849
Symptom_Shortness_of_breath	-0.0605209	0.687575
Symptom_Speech_difficulty_reading_processing_text	0.427047	0.682396
Symptom_Eye_Vision_blurred_vision	0.289325	0.677127
Symptom_Sensations_tingling_prickling	0.174277	0.674278
Symptom_Speech_difficulty_speaking_complete_sentences	0.413522	0.639939
Symptom_Sensations_weakness	0.158692	0.635356
Symptom_Eye_vision_symptoms	0.267766	0.631329
Symptom_Tachycardia	0.0228666	0.629812
Symptom_Sleep_other	0.0934223	0.624832
Symptom_Tightness_of_chest	-0.0828483	0.615997
Symptom_Vibrating_sensations	0.180135	0.611811
Symptom_Tremors	0.167557	0.59124
Symptom_Chills_flushing_sweats	0.0257312	0.588835
Symptom_Eye_Vision_sensitivity_to_light	0.244847	0.583181
Symptom_Gasping_air_normal_oxygen	-0.0016755	0.579336
Symptom_Dry_cough	-0.0871412	0.563636
Symptom_Ear_sensitivity_to_noise	0.192202	0.561928
Symptom_Waking_up_in_night	0.0652848	0.547408
Symptom_Headaches_stiff_neck	0.126538	0.543082
Symptom_Headaches_brain_pressure	0.187025	0.540241
Symptom_Headaches_behind_eyes	0.124251	0.540177
Symptom_Sensations_numbness_loss_sensation	0.152284	0.539817
Symptom_Elevated_temp	-0.0284536	0.539535
Symptom_Speech_difficulty_communicating_writing	0.331401	0.501125
Symptom_Muscle_spasms	0.13844	0.499019
Symptom_Headaches_after_mental_exertion	0.218606	0.49706
Symptom_Vivid_dreams	0.154736	0.48059
Symptom_Night_sweats	0.0529116	0.470967
Symptom_Sore_throat	-0.106867	0.466232
Symptom_Headaches_temples	0.105438	0.46421
Symptom_Loss_of_appetite	-0.0610705	0.463547
Symptom_Neuralgia	0.118576	0.460692
Symptom_Difficulty_falling_asleep	0.0466962	0.458021
Symptom_Headaches_diffuse	0.0942605	0.450434
Symptom_Nausea	-0.0423629	0.449235
Symptom_Loss_of_smell	0.0411012	0.442694
Symptom_Sensations_coldness	0.0478963	0.43218
Symptom_SkinAllergy_itchy_skin	0.0803241	0.431167
Symptom_Diarrhea	-0.156663	0.424017
Symptom_Slurring_words	0.236691	0.415157
Symptom_Extreme_thirst	0.0569553	0.407069
Symptom_Eye_Vision_dry_eyes	0.0820546	0.397522
Symptom_Heat_intolerance	0.100139	0.396943
Symptom_Merged_temperature_other_temp_issues	-0.0169056	0.396312
Symptom_Gastrointestinal_abdominal_pain	-0.051028	0.396079
Symptom_Sensations_electrical_zaps	0.114537	0.393951
Symptom_Tinnitus	0.0252291	0.392957
Symptom_Pain_burning_chest	-0.124722	0.379726
Symptom_Loss_of_taste	-0.00146945	0.371295
Symptom_Temp_lability	-0.0294285	0.37106
Symptom_Eye_Vision_eye_pressure_pain	0.0690239	0.357
Symptom_Headaches_base_of_skull	0.0532146	0.354603
Symptom_Headaches_migraines	0.0901658	0.348593
Symptom_Gastrointestinal_feeling_full_quickly_eating	0.00570626	0.342086
Symptom_Eye_Vision_other_eye_issues	0.0733422	0.341082
Symptom_Memory_forget_tasks	0.194504	0.340365
Symptom_Bone_ache_burning	0.0613797	0.338728
Symptom_Eye_Vision_floaters	0.115913	0.338505
Symptom_Nightmares	0.0786073	0.333121
Symptom_Acute_confusion	0.121381	0.332791
Symptom_SkinAllergy_itchy_eyes	0.0514624	0.329649
Symptom_Awakened_cannot_breathe	-0.0264652	0.326454
Symptom_Altered_taste	0.024964	0.32464
Symptom_Cognitive_Functioning_fastthoughts	0.125313	0.302356
Symptom_Speech_speaking_unrecognizable_words	0.202933	0.302334
Symptom_Skin_rashes	0.00606258	0.300237
Symptom_Fever	-0.015676	0.29685
Symptom_Waking_up_early	0.0309982	0.284513
Symptom_Memory_no_new_memories	0.195673	0.284281
Symptom_Difficulty_swallowing	-0.0622909	0.280226
Symptom_Other_ear_hearing_symptoms	0.0430104	0.269601
Symptom_Ear_ear_pain	-0.0133851	0.268395
Symptom_Restless_leg	0.0692234	0.268047
Symptom_Phantom_smell	-0.00941894	0.267785
Symptom_Constipation	-0.0189084	0.26396
Symptom_Acid_reflux	-0.11018	0.261859
Symptom_Change_sensitivity_to_meds	0.0335769	0.259973
Symptom_Cognitive_Functioning_agnosia	0.135456	0.252365
Symptom_Changes_in_voice	-0.0254797	0.251196
Symptom_Lucid_dreams	0.0838914	0.249932
Symptom_Runny_nose	-0.11002	0.24295
Symptom_Altered_smell	-0.00996162	0.239889
Symptom_Cough_with_mucus	-0.0741588	0.235866
Symptom_Eye_Vision_bloodshot_eyes	0.0738159	0.232812
Symptom_Sensations_numbness_one_sided_weakness	0.0864579	0.229419
Symptom_Eye_Vision_seeing_things_peripheral_vision	0.0707982	0.225295
Symptom_Gastrointestinal_hyperactive_bowel	-0.0495077	0.217718
Symptom_Bulging_veins	0.0147335	0.207303
Symptom_Covid_toes	0.0575652	0.20681
Symptom_Reproductive_sexual_dysfunction	0.079911	0.204701
Symptom_Ear_changes_to_ear_canal	-0.046179	0.202717
Symptom_Bladder_control	0.0139891	0.197429
Symptom_Hallucinations_visual	0.0785536	0.195633
Symptom_Fainting	0.0484846	0.19432
Symptom_Reproductive_other_urinary_issues	0.0219326	0.192846
Symptom_Eye_Vision_double_vision	0.0930384	0.190345
Symptom_Sneezing	-0.120231	0.185494
Symptom_Bradycardia	0.00245132	0.184272
Symptom_Headaches_other	0.0310581	0.173038
Symptom_Petechiae	-0.0274027	0.168073
Symptom_Low_temp	-0.0595633	0.165912
Symptom_Peeling_skin	0.0154231	0.164777
Symptom_Eye_Vision_pink_eye	0.0241331	0.164155
Symptom_Memory_other	0.0336259	0.159077
Symptom_Speech_changes_to_secondary_languages	0.101341	0.156781
Symptom_Sleep_apnea	0.0156035	0.153426
Symptom_Headaches_brain_warmth	0.0118591	0.150546
Symptom_SkinAllergy_brittle_nail	0.0120876	0.146563
Symptom_Rattling_breath	-0.0529535	0.145789
Symptom_SkinAllergy_heighted_reaction_allergies	-0.00359669	0.138703
Symptom_Skin_Allergy_other	0.02909	0.127323
Symptom_Hallucinations_auditory	0.038632	0.127098
Symptom_New_allergies	-0.00404034	0.124152
Symptom_Dermatographia	0.0184722	0.119186
Symptom_Sensations_facial_pressure_left	0.0179945	0.115316
Symptom_Hearing_loss	-0.001909	0.113797
Symptom_Reproductive_all_menstrual_issues	-0.100121	0.107985
Symptom_Vomiting	-0.0684044	0.103181
Symptom_Cognitive_Functioning_other	0.00915019	0.101928
Symptom_Heightened_smell	0.00199493	0.0986596
Symptom_Sensations_facial_pressure_other	0.0294204	0.0984209
Symptom_Phantom_taste	-0.0293609	0.0937683
Symptom_Eye_Vision_redness_outside_eye	-0.012688	0.0933458
Symptom_Sensations_facial_pressure_right	0.00504711	0.087821
Symptom_Reproductive_abnormally_irregular_periods	-0.050207	0.0855039
Symptom_Respiratory_other	-0.0165001	0.0759934
Symptom_Reproductive_other_menstrual_issues	-0.0326874	0.0663715
Symptom_Reproductive_abnormally_heavy_periods_clotting	-0.0429666	0.0655358
Symptom_SkinAllergy_other_itchy	-0.00495387	0.0613805
Symptom_Inability_to_yawn	-0.0221238	0.0418237

## Sheet: Cluster 3
variable	3-dif	3-abs
Symptom_Cognitive_Functioning_thinking	-0.684815	0.0466133
Symptom_Cognitive_Functioning_executive	-0.616091	0.0347242
Symptom_Cognitive_Functioning_attentionconcentration	-0.611025	0.195931
Symptom_Cognitive_Functioning_problemsolving	-0.600169	0.0192757
Symptom_Speech_difficulty_finding_words	-0.492166	0.0545799
Symptom_Memory_long	-0.467991	0.00581517
Symptom_Cognitive_Functioning_slowedthoughts	-0.426462	0.0566698
Symptom_Speech_difficulty_communicating_verbally	-0.345593	0.0110341
Symptom_Speech_difficulty_understanding_others_speech	-0.313223	1e-15
Symptom_Speech_difficulty_reading_processing_text	-0.307321	0.00451814
Symptom_Eye_Vision_sensitivity_to_light	-0.304471	0.0761175
Symptom_Eye_Vision_blurred_vision	-0.301632	0.131628
Symptom_Headaches_brain_pressure	-0.286157	0.103458
Symptom_Speech_difficulty_speaking_complete_sentences	-0.277653	0.00193116
Symptom_Eye_vision_symptoms	-0.271618	0.133436
Symptom_Headaches_after_mental_exertion	-0.270945	0.0451661
Symptom_Headaches_stiff_neck	-0.253175	0.192578
Symptom_Ear_sensitivity_to_noise	-0.251789	0.152091
Symptom_Acute_confusion	-0.232103	0.00649775
Symptom_Dizziness_vertigo	-0.223494	0.482325
Symptom_Sensations_weakness	-0.216944	0.288615
Symptom_Night_sweats	-0.215677	0.22304
Symptom_Speech_difficulty_communicating_writing	-0.211485	1e-15
Symptom_Sleep_other	-0.210953	0.34387
Symptom_Eye_Vision_eye_pressure_pain	-0.206005	0.103128
Symptom_Slurring_words	-0.193574	0.0179888
Symptom_Heat_intolerance	-0.192603	0.12672
Symptom_Joint_pain	-0.192127	0.39344
Symptom_Sensations_coldness	-0.188113	0.214325
Symptom_Headaches_behind_eyes	-0.187563	0.252348
Symptom_Muscle_spasms	-0.187418	0.198227
Symptom_Sensations_numbness_loss_sensation	-0.182507	0.230779
Symptom_Sensations_skin_burning_no_rash	-0.182498	0.327073
Symptom_SkinAllergy_itchy_eyes	-0.180999	0.115069
Symptom_Difficulty_falling_asleep	-0.177113	0.251428
Symptom_Vivid_dreams	-0.176166	0.175142
Symptom_Headaches_base_of_skull	-0.17503	0.143916
Symptom_Cognitive_Functioning_fastthoughts	-0.174878	0.0252562
Symptom_Memory_forget_tasks	-0.174224	1e-15
Symptom_Bone_ache_burning	-0.171909	0.123384
Symptom_Eye_Vision_dry_eyes	-0.169942	0.16491
Symptom_Neuralgia	-0.169479	0.194795
Symptom_Extreme_thirst	-0.167838	0.199568
Symptom_Waking_up_in_night	-0.159064	0.340316
Symptom_Eye_Vision_floaters	-0.158339	0.0853487
Symptom_SkinAllergy_itchy_skin	-0.158159	0.211029
Symptom_Headaches_migraines	-0.154372	0.122866
Symptom_Sensations_electrical_zaps	-0.153519	0.146514
Symptom_Nightmares	-0.148236	0.123727
Symptom_Eye_Vision_seeing_things_peripheral_vision	-0.146469	0.0247406
Symptom_Altered_taste	-0.146393	0.166464
Symptom_Headaches_diffuse	-0.146106	0.228557
Symptom_Headaches_temples	-0.145936	0.232173
Symptom_Phantom_smell	-0.145713	0.141975
Symptom_Chills_flushing_sweats	-0.141723	0.434262
Symptom_Muscle_aches	-0.141207	0.5611
Symptom_Loss_of_smell	-0.137715	0.277633
Symptom_Nausea	-0.137111	0.361776
Symptom_Awakened_cannot_breathe	-0.134958	0.226307
Symptom_Vibrating_sensations	-0.134555	0.321328
Symptom_Tinnitus	-0.132012	0.247812
Symptom_Altered_smell	-0.130198	0.128902
Symptom_Difficulty_swallowing	-0.12998	0.217744
Symptom_Loss_of_taste	-0.128811	0.253749
Symptom_Constipation	-0.128576	0.162728
Symptom_Cognitive_Functioning_agnosia	-0.125312	0.011656
Symptom_Speech_speaking_unrecognizable_words	-0.124596	1e-15
Symptom_Changes_in_voice	-0.124486	0.159806
Symptom_Tremors	-0.122995	0.323039
Symptom_Restless_leg	-0.120558	0.0928642
Symptom_Bladder_control	-0.120405	0.0733722
Symptom_Ear_ear_pain	-0.115122	0.174484
Symptom_Gastrointestinal_abdominal_pain	-0.11328	0.338616
Symptom_Memory_no_new_memories	-0.112298	1e-15
Symptom_Memory_other	-0.108664	0.0277321
Symptom_Elevated_temp	-0.10776	0.466329
Symptom_Sneezing	-0.106652	0.198028
Symptom_Lucid_dreams	-0.106554	0.074136
Symptom_Headaches_brain_warmth	-0.106004	0.0417488
Symptom_Runny_nose	-0.105864	0.246787
Symptom_SkinAllergy_brittle_nail	-0.103504	0.0398625
Symptom_Waking_up_early	-0.102072	0.161679
Symptom_Bulging_veins	-0.102038	0.0995133
Symptom_Temp_lability	-0.101751	0.304301
Symptom_Sensations_tingling_prickling	-0.101037	0.420142
Symptom_Eye_Vision_double_vision	-0.0998826	0.0122638
Symptom_PEM	-0.0993868	0.793327
Symptom_Eye_Vision_bloodshot_eyes	-0.0985364	0.0737174
Symptom_Hallucinations_visual	-0.0984507	0.0322447
Symptom_Reproductive_other_urinary_issues	-0.0975583	0.0825463
Symptom_Low_temp	-0.0975316	0.130865
Symptom_Gastrointestinal_hyperactive_bowel	-0.0962371	0.174583
Symptom_Petechiae	-0.0960875	0.104671
Symptom_Fainting	-0.0960363	0.0609157
Symptom_Peeling_skin	-0.0952484	0.0626186
Symptom_Skin_rashes	-0.0948255	0.207109
Symptom_Fever	-0.0941947	0.224371
Symptom_Eye_Vision_other_eye_issues	-0.0939162	0.186689
Symptom_Insomnia	-0.0934712	0.600474
Symptom_Other_ear_hearing_symptoms	-0.0927437	0.14429
Symptom_Sensations_numbness_one_sided_weakness	-0.0924738	0.0642508
Symptom_Reproductive_sexual_dysfunction	-0.0912543	0.0467022
Symptom_Rattling_breath	-0.0890047	0.112511
Symptom_Hallucinations_auditory	-0.0889129	0.00936461
Symptom_Sleep_apnea	-0.0876692	0.0580973
Symptom_Merged_temperature_other_temp_issues	-0.0846625	0.333767
Symptom_Eye_Vision_redness_outside_eye	-0.0832922	0.0281727
Symptom_Ear_changes_to_ear_canal	-0.0831071	0.168629
Symptom_Change_sensitivity_to_meds	-0.0815459	0.153706
Symptom_Dermatographia	-0.0789063	0.0292981
Symptom_Phantom_taste	-0.0788324	0.0481024
Symptom_Covid_toes	-0.0784521	0.0812551
Symptom_Tachycardia	-0.0783005	0.536427
Symptom_Shortness_of_breath	-0.0782958	0.671167
Symptom_Bradycardia	-0.0750267	0.112754
Symptom_Sensations_facial_pressure_left	-0.0739107	0.0304803
Symptom_Heart_palpitations	-0.0717027	0.605605
Symptom_Gasping_air_normal_oxygen	-0.0713253	0.515044
Symptom_Hearing_loss	-0.0709271	0.0500885
Symptom_Cough_with_mucus	-0.0693709	0.240285
Symptom_Reproductive_all_menstrual_issues	-0.0684245	0.137244
Symptom_New_allergies	-0.0678698	0.0652324
Symptom_Eye_Vision_pink_eye	-0.0671274	0.0799147
Symptom_Dry_cough	-0.0661993	0.582967
Symptom_Speech_changes_to_secondary_languages	-0.0650065	0.00322933
Symptom_Reproductive_abnormally_heavy_periods_clotting	-0.0647766	0.0454034
Symptom_Gastrointestinal_feeling_full_quickly_eating	-0.064432	0.277343
Symptom_Vomiting	-0.0613326	0.109709
Symptom_Sensations_facial_pressure_right	-0.0594841	0.0282537
Symptom_SkinAllergy_heighted_reaction_allergies	-0.0582752	0.0882302
Symptom_Sensations_facial_pressure_other	-0.0568993	0.0187411
Symptom_Acid_reflux	-0.0561908	0.311695
Symptom_Loss_of_appetite	-0.0519467	0.471969
Symptom_Heightened_smell	-0.0487209	0.051845
Symptom_Reproductive_abnormally_irregular_periods	-0.0455702	0.0897841
Symptom_Pain_burning_chest	-0.0433349	0.454853
Symptom_Cognitive_Functioning_other	-0.0422243	0.0545054
Symptom_Headaches_other	-0.041235	0.106306
Symptom_Tightness_of_chest	-0.037064	0.65826
Symptom_Sore_throat	-0.034948	0.532619
Symptom_Inability_to_yawn	-0.0308098	0.0338058
Symptom_SkinAllergy_other_itchy	-0.0266404	0.0413621
Symptom_Reproductive_other_menstrual_issues	-0.0209717	0.077186
Symptom_Skin_Allergy_other	-0.0189251	0.0830014
Symptom_Diarrhea	-0.015752	0.554089
Symptom_Respiratory_other	0.00144087	0.0925542
Symptom_Memory_short	0.054551	0.976862

## Sheet: Cluster 4
variable	4-dif	4-abs
Symptom_Memory_short	0.0176247	0.942776
Symptom_PEM	-0.384949	0.529731
Symptom_Dry_cough	-0.245561	0.417403
Symptom_Shortness_of_breath	-0.378994	0.3936
Symptom_Loss_of_smell	-0.0509086	0.357762
Symptom_Tightness_of_chest	-0.380283	0.341442
Symptom_Loss_of_taste	-0.0705699	0.30751
Symptom_Muscle_aches	-0.482047	0.246479
Symptom_Heart_palpitations	-0.490049	0.219439
Symptom_Sore_throat	-0.383548	0.210834
Symptom_Gasping_air_normal_oxygen	-0.405201	0.206852
Symptom_Altered_taste	-0.105049	0.204628
Symptom_Diarrhea	-0.39541	0.203635
Symptom_Altered_smell	-0.0679417	0.186369
Symptom_Runny_nose	-0.178179	0.180034
Symptom_Pain_burning_chest	-0.341462	0.179658
Symptom_Tachycardia	-0.468983	0.175797
Symptom_Cognitive_Functioning_attentionconcentration	-0.64458	0.164957
Symptom_Loss_of_appetite	-0.3904	0.159551
Symptom_Dizziness_vertigo	-0.573196	0.159523
Symptom_Elevated_temp	-0.441306	0.158441
Symptom_Joint_pain	-0.451516	0.154004
Symptom_Sleep_other	-0.418497	0.152291
Symptom_Cough_with_mucus	-0.18758	0.131169
Symptom_Phantom_smell	-0.158636	0.130046
Symptom_Sensations_tingling_prickling	-0.418841	0.126784
Symptom_Sensations_weakness	-0.397245	0.122183
Symptom_Sensations_skin_burning_no_rash	-0.408703	0.118269
Symptom_Chills_flushing_sweats	-0.485442	0.116982
Symptom_Temp_lability	-0.311136	0.111023
Symptom_Cognitive_Functioning_slowedthoughts	-0.367722	0.110891
Symptom_Merged_temperature_other_temp_issues	-0.331671	0.105759
Symptom_Insomnia	-0.645144	0.091238
Symptom_Nausea	-0.431609	0.0899309
Symptom_Sneezing	-0.226165	0.0877079
Symptom_Headaches_behind_eyes	-0.366822	0.0868785
Symptom_Headaches_temples	-0.305209	0.0851517
Symptom_Respiratory_other	-0.00713247	0.0846404
Symptom_Vibrating_sensations	-0.391858	0.0838175
Symptom_Sensations_coldness	-0.331159	0.0822831
Symptom_Cognitive_Functioning_thinking	-0.64639	0.0820829
Symptom_Gastrointestinal_feeling_full_quickly_eating	-0.275994	0.0820554
Symptom_Tremors	-0.385565	0.0806658
Symptom_Headaches_diffuse	-0.310232	0.0770563
Symptom_Fever	-0.25426	0.0766183
Symptom_Changes_in_voice	-0.219961	0.0716751
Symptom_Acid_reflux	-0.317376	0.070601
Symptom_Eye_Vision_other_eye_issues	-0.220355	0.0699763
Symptom_Change_sensitivity_to_meds	-0.173333	0.0689787
Symptom_SkinAllergy_itchy_skin	-0.315526	0.0657669
Symptom_Sensations_numbness_loss_sensation	-0.36297	0.0641978
Symptom_Gastrointestinal_abdominal_pain	-0.411877	0.0629882
Symptom_Speech_difficulty_finding_words	-0.483494	0.0625853
Symptom_Difficulty_swallowing	-0.302236	0.0587386
Symptom_Constipation	-0.243815	0.0563538
Symptom_Headaches_stiff_neck	-0.40146	0.0556994
Symptom_Skin_rashes	-0.259259	0.0553242
Symptom_Tinnitus	-0.342107	0.0538774
Symptom_Other_ear_hearing_symptoms	-0.192607	0.0521083
Symptom_Reproductive_all_menstrual_issues	-0.161342	0.0514739
Symptom_Headaches_other	-0.102666	0.0496008
Symptom_Rattling_breath	-0.158017	0.0488072
Symptom_Phantom_taste	-0.0783727	0.0485267
Symptom_Gastrointestinal_hyperactive_bowel	-0.234007	0.0474112
Symptom_Eye_Vision_dry_eyes	-0.299274	0.0455269
Symptom_Memory_long	-0.42519	0.0453238
Symptom_Reproductive_other_menstrual_issues	-0.0558735	0.0449689
Symptom_Cognitive_Functioning_executive	-0.605416	0.0445781
Symptom_Bone_ache_burning	-0.257868	0.0440371
Symptom_Memory_other	-0.0926813	0.0424857
Symptom_Awakened_cannot_breathe	-0.335836	0.0408808
Symptom_Ear_sensitivity_to_noise	-0.372518	0.0406481
Symptom_Night_sweats	-0.414403	0.0396002
Symptom_Headaches_brain_pressure	-0.355947	0.0390367
Symptom_Eye_Vision_pink_eye	-0.112134	0.03837
Symptom_Ear_changes_to_ear_canal	-0.224276	0.0383192
Symptom_Sensations_electrical_zaps	-0.2708	0.0382552
Symptom_Sleep_apnea	-0.111246	0.0363339
Symptom_SkinAllergy_itchy_eyes	-0.26641	0.0362283
Symptom_Muscle_spasms	-0.36303	0.0361231
Symptom_Heat_intolerance	-0.291138	0.0357642
Symptom_Cognitive_Functioning_problemsolving	-0.582617	0.0354783
Symptom_Headaches_base_of_skull	-0.293531	0.03453
Symptom_Headaches_migraines	-0.250804	0.0338513
Symptom_Covid_toes	-0.13062	0.0331002
Symptom_Neuralgia	-0.348927	0.0291502
Symptom_Eye_Vision_eye_pressure_pain	-0.28649	0.0288341
Symptom_Difficulty_falling_asleep	-0.419418	0.0277624
Symptom_Cognitive_Functioning_other	-0.0725371	0.0265244
Symptom_Eye_Vision_blurred_vision	-0.416109	0.0259561
Symptom_Reproductive_abnormally_irregular_periods	-0.114996	0.0256992
Symptom_Extreme_thirst	-0.35698	0.0249753
Symptom_Skin_Allergy_other	-0.0831565	0.0237109
Symptom_Vivid_dreams	-0.340535	0.0234167
Symptom_Bradycardia	-0.172286	0.0229758
Symptom_Hearing_loss	-0.100734	0.0225747
Symptom_Reproductive_sexual_dysfunction	-0.118239	0.0217936
Symptom_Peeling_skin	-0.14114	0.0202567
Symptom_Ear_ear_pain	-0.28228	0.0201843
Symptom_Eye_Vision_floaters	-0.229784	0.0193992
Symptom_Headaches_after_mental_exertion	-0.298968	0.0192983
Symptom_SkinAllergy_brittle_nail	-0.127125	0.0180589
Symptom_Inability_to_yawn	-0.0480595	0.017883
Symptom_Eye_Vision_sensitivity_to_light	-0.367971	0.0175019
Symptom_Waking_up_in_night	-0.508827	0.0174578
Symptom_Reproductive_abnormally_heavy_periods_clotting	-0.096202	0.0163955
Symptom_Eye_Vision_bloodshot_eyes	-0.161349	0.015737
Symptom_Fainting	-0.144994	0.0157242
Symptom_Vomiting	-0.163502	0.0153986
Symptom_Cognitive_Functioning_fastthoughts	-0.186027	0.014965
Symptom_Low_temp	-0.223327	0.014746
Symptom_Speech_difficulty_communicating_verbally	-0.341938	0.0144082
Symptom_Petechiae	-0.194099	0.0141986
Symptom_Headaches_brain_warmth	-0.136599	0.0135076
Symptom_Reproductive_other_urinary_issues	-0.172458	0.0134079
Symptom_Eye_Vision_redness_outside_eye	-0.0994288	0.0132773
Symptom_SkinAllergy_other_itchy	-0.0571091	0.0132372
Symptom_SkinAllergy_heighted_reaction_allergies	-0.139621	0.0131419
Symptom_Bladder_control	-0.185842	0.012969
Symptom_Eye_vision_symptoms	-0.402257	0.0128466
Symptom_New_allergies	-0.125473	0.01206
Symptom_Waking_up_early	-0.265303	0.0110042
Symptom_Sensations_numbness_one_sided_weakness	-0.150592	0.0106034
Symptom_Hallucinations_auditory	-0.0879077	0.0102925
Symptom_Restless_leg	-0.210159	0.0101548
Symptom_Dermatographia	-0.0997109	0.0100939
Symptom_Hallucinations_visual	-0.123411	0.00920412
Symptom_Heightened_smell	-0.0950381	0.00909065
Symptom_Lucid_dreams	-0.177812	0.00835938
Symptom_Bulging_veins	-0.201235	0.00794728
Symptom_Speech_difficulty_communicating_writing	-0.203886	0.00701397
Symptom_Memory_no_new_memories	-0.105262	0.00649507
Symptom_Nightmares	-0.275906	0.00587813
Symptom_Cognitive_Functioning_agnosia	-0.132095	0.00539479
Symptom_Speech_difficulty_reading_processing_text	-0.306523	0.00525492
Symptom_Sensations_facial_pressure_right	-0.0844501	0.00520818
Symptom_Speech_changes_to_secondary_languages	-0.0628722	0.00519946
Symptom_Eye_Vision_double_vision	-0.107551	0.00518523
Symptom_Memory_forget_tasks	-0.170066	0.00383812
Symptom_Eye_Vision_seeing_things_peripheral_vision	-0.170146	0.00288469
Symptom_Acute_confusion	-0.236272	0.00264957
Symptom_Speech_difficulty_speaking_complete_sentences	-0.276922	0.00260592
Symptom_Speech_speaking_unrecognizable_words	-0.12178	0.00259872
Symptom_Sensations_facial_pressure_other	-0.0743962	0.00259009
Symptom_Speech_difficulty_understanding_others_speech	-0.313223	1e-15
Symptom_Slurring_words	-0.213062	1e-15
Symptom_Sensations_facial_pressure_left	-0.106931	1e-15

## Sheet: Cluster 5
variable	5-dif	5-abs
Symptom_PEM	0.0394264	0.921462
Symptom_Memory_short	-0.0649288	0.866573
Symptom_Shortness_of_breath	0.0897409	0.826278
Symptom_Tightness_of_chest	0.129349	0.811872
Symptom_Dizziness_vertigo	0.12085	0.800181
Symptom_Cognitive_Functioning_attentionconcentration	0.0217472	0.780029
Symptom_Heart_palpitations	0.113612	0.776665
Symptom_Dry_cough	0.0912742	0.728327
Symptom_Muscle_aches	0.0315551	0.720573
Symptom_Cognitive_Functioning_thinking	0.0259799	0.702732
Symptom_Gasping_air_normal_oxygen	0.129853	0.700747
Symptom_Diarrhea	0.0961179	0.657353
Symptom_Tachycardia	0.0506928	0.655498
Symptom_Chills_flushing_sweats	0.0958969	0.653603
Symptom_Sore_throat	0.082192	0.640748
Symptom_Elevated_temp	0.0512915	0.613146
Symptom_Joint_pain	0.0205133	0.589723
Symptom_Pain_burning_chest	0.0985043	0.585782
Symptom_Speech_difficulty_finding_words	0.0660577	0.569864
Symptom_Loss_of_appetite	0.0454194	0.561846
Symptom_Cognitive_Functioning_executive	-0.0475196	0.559559
Symptom_Sensations_skin_burning_no_rash	0.0651554	0.555676
Symptom_Sensations_tingling_prickling	0.0429682	0.55307
Symptom_Cognitive_Functioning_problemsolving	-0.0385719	0.537673
Symptom_Nausea	0.0429045	0.527943
Symptom_Gastrointestinal_abdominal_pain	0.0564938	0.49533
Symptom_Sensations_weakness	0.00305615	0.491692
Symptom_Eye_Vision_blurred_vision	0.0737326	0.478118
Symptom_Merged_temperature_other_temp_issues	0.0712926	0.477725
Symptom_Vibrating_sensations	0.020684	0.464626
Symptom_Sensations_coldness	0.0733834	0.455707
Symptom_Eye_vision_symptoms	0.0599158	0.439468
Symptom_Sleep_other	-0.108987	0.437992
Symptom_SkinAllergy_itchy_skin	0.0793953	0.430309
Symptom_Temp_lability	0.0341873	0.429783
Symptom_Headaches_stiff_neck	-0.00558552	0.421122
Symptom_Headaches_behind_eyes	-0.0137868	0.412757
Symptom_Sensations_numbness_loss_sensation	0.00695234	0.405665
Symptom_Eye_Vision_dry_eyes	0.0891183	0.404043
Symptom_Extreme_thirst	0.0529067	0.403332
Symptom_Tinnitus	0.0358889	0.402797
Symptom_Cognitive_Functioning_slowedthoughts	-0.0551006	0.399465
Symptom_Neuralgia	0.0362374	0.384687
Symptom_Gastrointestinal_feeling_full_quickly_eating	0.0490165	0.382065
Symptom_Eye_Vision_sensitivity_to_light	0.0243164	0.379614
Symptom_Acid_reflux	0.0165623	0.378852
Symptom_Ear_sensitivity_to_noise	-0.0211523	0.364986
Symptom_Memory_long	-0.0810453	0.362996
Symptom_Loss_of_smell	-0.0455082	0.362747
Symptom_Eye_Vision_other_eye_issues	0.0967173	0.362659
Symptom_Skin_rashes	0.0722273	0.361312
Symptom_Headaches_diffuse	-0.00399301	0.359738
Symptom_Muscle_spasms	-0.0126349	0.359565
Symptom_Headaches_brain_pressure	-0.0141743	0.354519
Symptom_Tremors	-0.0937147	0.350066
Symptom_Difficulty_swallowing	0.0111434	0.348012
Symptom_Runny_nose	0.00216959	0.34651
Symptom_Loss_of_taste	-0.0335705	0.341664
Symptom_Fever	0.0304638	0.33944
Symptom_SkinAllergy_itchy_eyes	0.0591317	0.336728
Symptom_Changes_in_voice	0.0621862	0.332118
Symptom_Sneezing	0.0222621	0.317025
Symptom_Eye_Vision_eye_pressure_pain	0.00599221	0.298817
Symptom_Sensations_electrical_zaps	-0.000561524	0.287706
Symptom_Ear_ear_pain	-0.00353234	0.27749
Symptom_Cough_with_mucus	-0.0330036	0.273855
Symptom_Headaches_temples	-0.103162	0.271657
Symptom_Gastrointestinal_hyperactive_bowel	0.0078001	0.270618
Symptom_Speech_difficulty_communicating_verbally	-0.0651644	0.269891
Symptom_Constipation	-0.0157645	0.266862
Symptom_Headaches_base_of_skull	-0.047508	0.261628
Symptom_Altered_taste	-0.0495804	0.25583
Symptom_Heat_intolerance	-0.0546236	0.254085
Symptom_Bone_ache_burning	-0.036018	0.248822
Symptom_Phantom_smell	-0.0448296	0.235098
Symptom_Other_ear_hearing_symptoms	0.00448735	0.234041
Symptom_Low_temp	0.0103741	0.23047
Symptom_Bulging_veins	0.0397757	0.230418
Symptom_Reproductive_all_menstrual_issues	0.0243607	0.222892
Symptom_Petechiae	0.0272931	0.218561
Symptom_Altered_smell	-0.0330826	0.218547
Symptom_Rattling_breath	0.0247111	0.217479
Symptom_Eye_Vision_floaters	-0.016352	0.216414
Symptom_Speech_difficulty_understanding_others_speech	-0.084572	0.211062
Symptom_Night_sweats	-0.230229	0.209607
Symptom_Covid_toes	0.0577994	0.207026
Symptom_Ear_changes_to_ear_canal	-0.041847	0.206715
Symptom_Speech_difficulty_reading_processing_text	-0.0900858	0.205043
Symptom_Change_sensitivity_to_meds	-0.0296826	0.201579
Symptom_Memory_other	0.0767205	0.198857
Symptom_Headaches_after_mental_exertion	-0.107765	0.195794
Symptom_Headaches_migraines	-0.0761682	0.195053
Symptom_Vomiting	0.0285685	0.192695
Symptom_Bladder_control	0.00838017	0.192251
Symptom_Eye_Vision_pink_eye	0.0511014	0.189049
Symptom_Reproductive_other_urinary_issues	0.0162075	0.187561
Symptom_Speech_difficulty_speaking_complete_sentences	-0.0935659	0.171858
Symptom_Bradycardia	-0.0142643	0.168842
Symptom_Awakened_cannot_breathe	-0.199053	0.167142
Symptom_Respiratory_other	0.0793046	0.164428
Symptom_Headaches_other	0.0194917	0.162362
Symptom_Skin_Allergy_other	0.0660998	0.161486
Symptom_Peeling_skin	0.0116783	0.16132
Symptom_Eye_Vision_bloodshot_eyes	-0.00429955	0.160705
Symptom_Sensations_numbness_one_sided_weakness	0.0114689	0.160198
Symptom_Slurring_words	-0.0531434	0.147617
Symptom_SkinAllergy_heighted_reaction_allergies	0.00483967	0.14649
Symptom_Cognitive_Functioning_other	0.0488763	0.138598
Symptom_Acute_confusion	-0.0901697	0.137513
Symptom_New_allergies	0.0068974	0.134248
Symptom_Fainting	-0.0230692	0.12827
Symptom_Speech_difficulty_communicating_writing	-0.0751577	0.12584
Symptom_Eye_Vision_redness_outside_eye	0.0217337	0.12512
Symptom_Vivid_dreams	-0.233017	0.122664
Symptom_Reproductive_abnormally_irregular_periods	-0.0111307	0.121574
Symptom_SkinAllergy_brittle_nail	-0.0169039	0.119801
Symptom_Reproductive_other_menstrual_issues	0.0220553	0.116903
Symptom_Eye_Vision_seeing_things_peripheral_vision	-0.048879	0.114824
Symptom_Memory_forget_tasks	-0.0600719	0.105371
Symptom_Cognitive_Functioning_fastthoughts	-0.0901074	0.103506
Symptom_Reproductive_sexual_dysfunction	-0.0327889	0.10067
Symptom_Headaches_brain_warmth	-0.0449499	0.0981064
Symptom_Eye_Vision_double_vision	-0.0077106	0.0973457
Symptom_Reproductive_abnormally_heavy_periods_clotting	-0.0150165	0.0913358
Symptom_Sensations_facial_pressure_left	-0.0127007	0.0869819
Symptom_Speech_speaking_unrecognizable_words	-0.0307335	0.086642
Symptom_Hearing_loss	-0.0317789	0.0862253
Symptom_Dermatographia	-0.0173123	0.0861541
Symptom_Sensations_facial_pressure_other	0.0157855	0.0858348
Symptom_Hallucinations_visual	-0.0498823	0.077077
Symptom_SkinAllergy_other_itchy	0.0112103	0.0763013
Symptom_Cognitive_Functioning_agnosia	-0.0565215	0.0751553
Symptom_Insomnia	-0.66423	0.0736199
Symptom_Nightmares	-0.207454	0.0690644
Symptom_Heightened_smell	-0.0328903	0.0664579
Symptom_Phantom_taste	-0.0646042	0.0612361
Symptom_Sensations_facial_pressure_right	-0.0255117	0.0596128
Symptom_Lucid_dreams	-0.123445	0.0585442
Symptom_Hallucinations_auditory	-0.0384115	0.0559813
Symptom_Inability_to_yawn	-0.0114831	0.0516459
Symptom_Speech_changes_to_secondary_languages	-0.0171602	0.0473951
Symptom_Restless_leg	-0.171911	0.045461
Symptom_Memory_no_new_memories	-0.0703837	0.0386905
Symptom_Sleep_apnea	-0.116534	0.0314527
Symptom_Waking_up_early	-0.277224	1e-15
Symptom_Difficulty_falling_asleep	-0.449494	1e-15
Symptom_Waking_up_in_night	-0.52774	1e-15

## Sheet: Cluster 6
variable	6-dif	6-abs
Symptom_Speech_difficulty_finding_words	0.515016	0.984287
Symptom_PEM	0.0868479	0.965236
Symptom_Cognitive_Functioning_attentionconcentration	0.206808	0.950854
Symptom_Shortness_of_breath	0.214625	0.941556
Symptom_Memory_short	0.0111437	0.936794
Symptom_Cognitive_Functioning_thinking	0.238349	0.898765
Symptom_Insomnia	0.21744	0.887469
Symptom_Tightness_of_chest	0.201497	0.87847
Symptom_Dizziness_vertigo	0.187089	0.861324
Symptom_Heart_palpitations	0.181786	0.839595
Symptom_Cognitive_Functioning_executive	0.246577	0.831033
Symptom_Elevated_temp	0.282926	0.826963
Symptom_Cognitive_Functioning_problemsolving	0.255937	0.809528
Symptom_Dry_cough	0.179013	0.809317
Symptom_Muscle_aches	0.1221	0.804153
Symptom_Chills_flushing_sweats	0.25436	0.799876
Symptom_Sore_throat	0.2315	0.778571
Symptom_Diarrhea	0.22186	0.773423
Symptom_Sleep_other	0.251103	0.770384
Symptom_Tachycardia	0.169357	0.765034
Symptom_Gasping_air_normal_oxygen	0.1689	0.73679
Symptom_Loss_of_appetite	0.226101	0.728629
Symptom_Nausea	0.219867	0.691294
Symptom_Waking_up_in_night	0.213487	0.68421
Symptom_Joint_pain	0.115807	0.677686
Symptom_Speech_difficulty_communicating_verbally	0.355191	0.657912
Symptom_Difficulty_falling_asleep	0.254548	0.649885
Symptom_Cognitive_Functioning_slowedthoughts	0.198859	0.63389
Symptom_Pain_burning_chest	0.145523	0.629184
Symptom_Memory_long	0.197879	0.620465
Symptom_Temp_lability	0.216321	0.597906
Symptom_Speech_difficulty_reading_processing_text	0.332663	0.595273
Symptom_Gastrointestinal_abdominal_pain	0.156573	0.587711
Symptom_Night_sweats	0.172612	0.581461
Symptom_Speech_difficulty_understanding_others_speech	0.312639	0.577719
Symptom_Headaches_stiff_neck	0.151184	0.565832
Symptom_Merged_temperature_other_temp_issues	0.163747	0.563068
Symptom_Sensations_weakness	0.0599282	0.544189
Symptom_Fever	0.244584	0.53709
Symptom_Runny_nose	0.191598	0.521367
Symptom_Sensations_tingling_prickling	0.00192509	0.515184
Symptom_Acid_reflux	0.147522	0.499738
Symptom_Loss_of_smell	0.102163	0.499058
Symptom_Ear_sensitivity_to_noise	0.102544	0.479167
Symptom_Eye_Vision_blurred_vision	0.0740907	0.478449
Symptom_Speech_difficulty_speaking_complete_sentences	0.231835	0.472229
Symptom_Headaches_behind_eyes	0.0501096	0.471739
Symptom_Loss_of_taste	0.106825	0.471259
Symptom_Awakened_cannot_breathe	0.130196	0.471065
Symptom_Sensations_skin_burning_no_rash	-0.0275399	0.470111
Symptom_Cough_with_mucus	0.170422	0.461633
Symptom_Headaches_temples	0.0974862	0.45687
Symptom_Vibrating_sensations	0.00415327	0.449366
Symptom_Headaches_diffuse	0.0930573	0.449323
Symptom_Extreme_thirst	0.0908541	0.438361
Symptom_Sneezing	0.152139	0.436912
Symptom_Gastrointestinal_feeling_full_quickly_eating	0.105619	0.434313
Symptom_Vivid_dreams	0.103611	0.433398
Symptom_Tremors	-0.00625675	0.430797
Symptom_Tinnitus	0.0612032	0.426164
Symptom_Sensations_coldness	0.0380675	0.423108
Symptom_Heat_intolerance	0.127534	0.422231
Symptom_Eye_Vision_sensitivity_to_light	0.0674245	0.419406
Symptom_Constipation	0.14257	0.413017
Symptom_Headaches_after_mental_exertion	0.121245	0.407188
Symptom_Difficulty_swallowing	0.0706505	0.402941
Symptom_Headaches_brain_pressure	0.0376782	0.402383
Symptom_Eye_vision_symptoms	0.0197289	0.402372
Symptom_SkinAllergy_itchy_skin	0.0318018	0.386377
Symptom_Altered_taste	0.0783223	0.373894
Symptom_Reproductive_all_menstrual_issues	0.17631	0.363152
Symptom_Waking_up_early	0.114505	0.361597
Symptom_Headaches_base_of_skull	0.0516381	0.353148
Symptom_Phantom_smell	0.0810455	0.351291
Symptom_Nightmares	0.0941058	0.347427
Symptom_Muscle_spasms	-0.0291765	0.344296
Symptom_Sensations_numbness_loss_sensation	-0.0671005	0.337308
Symptom_Low_temp	0.12382	0.33519
Symptom_Gastrointestinal_hyperactive_bowel	0.0673315	0.32557
Symptom_Speech_difficulty_communicating_writing	0.137375	0.322024
Symptom_Ear_ear_pain	0.0446938	0.322006
Symptom_Eye_Vision_dry_eyes	-0.00825139	0.314163
Symptom_Headaches_migraines	0.0501917	0.311693
Symptom_Skin_rashes	0.0159039	0.309321
Symptom_Bone_ache_burning	0.0276149	0.30756
Symptom_Neuralgia	-0.0586941	0.297058
Symptom_Changes_in_voice	0.0229633	0.295913
Symptom_Eye_Vision_eye_pressure_pain	0.00197359	0.295108
Symptom_Altered_smell	0.045559	0.291139
Symptom_Rattling_breath	0.103071	0.289811
Symptom_Change_sensitivity_to_meds	0.0593384	0.283753
Symptom_Acute_confusion	0.0554212	0.271905
Symptom_Ear_changes_to_ear_canal	0.0246844	0.268129
Symptom_Eye_Vision_other_eye_issues	-0.00630798	0.267558
Symptom_Vomiting	0.106247	0.264398
Symptom_Restless_leg	0.0589423	0.258556
Symptom_Cognitive_Functioning_fastthoughts	0.0746711	0.255609
Symptom_SkinAllergy_itchy_eyes	-0.0394739	0.245708
Symptom_Sensations_electrical_zaps	-0.0479682	0.243946
Symptom_Other_ear_hearing_symptoms	0.0115895	0.240597
Symptom_Reproductive_abnormally_irregular_periods	0.115644	0.238598
Symptom_Bradycardia	0.0388766	0.217895
Symptom_Reproductive_abnormally_heavy_periods_clotting	0.118531	0.214611
Symptom_Memory_forget_tasks	0.0550894	0.211674
Symptom_Slurring_words	0.0162097	0.211635
Symptom_Memory_other	0.0881222	0.209381
Symptom_Bladder_control	0.025357	0.207922
Symptom_Eye_Vision_floaters	-0.0276756	0.205961
Symptom_Lucid_dreams	0.0348074	0.204624
Symptom_Reproductive_other_urinary_issues	0.021743	0.192671
Symptom_Eye_Vision_seeing_things_peripheral_vision	0.0144409	0.173273
Symptom_Fainting	0.01953	0.167592
Symptom_Speech_speaking_unrecognizable_words	0.0558153	0.166533
Symptom_Petechiae	-0.0360022	0.160134
Symptom_New_allergies	0.0345271	0.159753
Symptom_Cognitive_Functioning_other	0.0676215	0.155902
Symptom_Bulging_veins	-0.0413941	0.155492
Symptom_Sleep_apnea	0.0136503	0.151623
Symptom_Reproductive_other_menstrual_issues	0.0589513	0.150961
Symptom_SkinAllergy_heighted_reaction_allergies	0.00961054	0.150894
Symptom_Peeling_skin	-0.00200908	0.148686
Symptom_Headaches_other	-0.000960012	0.143483
Symptom_Cognitive_Functioning_agnosia	0.0113485	0.137805
Symptom_Skin_Allergy_other	0.0338894	0.131753
Symptom_Covid_toes	-0.0292517	0.126671
Symptom_Eye_Vision_bloodshot_eyes	-0.0460959	0.122124
Symptom_Reproductive_sexual_dysfunction	-0.0111559	0.120639
Symptom_Headaches_brain_warmth	-0.0212443	0.119989
Symptom_Eye_Vision_pink_eye	-0.0264978	0.117419
Symptom_Hearing_loss	-0.0025398	0.113215
Symptom_Hallucinations_visual	-0.0127244	0.111377
Symptom_Speech_changes_to_secondary_languages	0.0510052	0.110317
Symptom_Heightened_smell	0.00904416	0.105167
Symptom_Phantom_taste	-0.0216533	0.100883
Symptom_SkinAllergy_brittle_nail	-0.0454052	0.0934924
Symptom_Eye_Vision_double_vision	-0.0193547	0.0865973
Symptom_Memory_no_new_memories	-0.0192164	0.0859219
Symptom_Respiratory_other	-0.00666228	0.0850744
Symptom_Hallucinations_auditory	-0.0283053	0.0653101
Symptom_Sensations_numbness_one_sided_weakness	-0.0931551	0.0636219
Symptom_Dermatographia	-0.0431943	0.062263
Symptom_Eye_Vision_redness_outside_eye	-0.0474328	0.0612737
Symptom_SkinAllergy_other_itchy	-0.0172426	0.0500371
Symptom_Inability_to_yawn	-0.018483	0.0451844
Symptom_Sensations_facial_pressure_other	-0.0322801	0.0414665
Symptom_Sensations_facial_pressure_left	-0.072214	0.0320465
Symptom_Sensations_facial_pressure_right	-0.0677975	0.0205798

## Sheet: Cluster 7
variable	7-dif	7-abs
Symptom_Speech_difficulty_finding_words	0.523666	0.992271
Symptom_Speech_difficulty_communicating_verbally	0.486542	0.779159
Symptom_Speech_difficulty_understanding_others_speech	0.46923	0.722264
Symptom_Speech_difficulty_reading_processing_text	0.455417	0.708584
Symptom_Eye_vision_symptoms	0.43942	0.78978
Symptom_Speech_difficulty_speaking_complete_sentences	0.431901	0.656904
Symptom_Muscle_spasms	0.416825	0.75599
Symptom_Neuralgia	0.416544	0.735739
Symptom_Sensations_skin_burning_no_rash	0.407331	0.871531
Symptom_Eye_Vision_blurred_vision	0.407167	0.785903
Symptom_Ear_sensitivity_to_noise	0.394039	0.74824
Symptom_Eye_Vision_sensitivity_to_light	0.382331	0.710088
Symptom_Gastrointestinal_abdominal_pain	0.37213	0.786687
Symptom_Tinnitus	0.369147	0.71042
Symptom_Sensations_numbness_loss_sensation	0.364837	0.73602
Symptom_Eye_Vision_eye_pressure_pain	0.361845	0.627297
Symptom_Headaches_stiff_neck	0.354568	0.753572
Symptom_SkinAllergy_itchy_eyes	0.353732	0.608667
Symptom_Nausea	0.351049	0.812385
Symptom_Acute_confusion	0.35003	0.543851
Symptom_Headaches_brain_pressure	0.344666	0.685756
Symptom_Joint_pain	0.339642	0.884304
Symptom_Sensations_coldness	0.33959	0.701436
Symptom_Sensations_tingling_prickling	0.338502	0.82587
Symptom_Tremors	0.334542	0.74538
Symptom_Slurring_words	0.333557	0.50457
Symptom_SkinAllergy_itchy_skin	0.332053	0.663531
Symptom_Extreme_thirst	0.331928	0.660891
Symptom_Chills_flushing_sweats	0.331335	0.87093
Symptom_Memory_long	0.33109	0.743428
Symptom_Sensations_electrical_zaps	0.328091	0.591078
Symptom_Difficulty_swallowing	0.325239	0.637946
Symptom_Cognitive_Functioning_problemsolving	0.324918	0.873203
Symptom_Sensations_weakness	0.317845	0.782267
Symptom_Speech_difficulty_communicating_writing	0.315457	0.486408
Symptom_Bone_ache_burning	0.314044	0.571956
Symptom_Heat_intolerance	0.304965	0.586013
Symptom_Vibrating_sensations	0.301314	0.723669
Symptom_Dizziness_vertigo	0.300807	0.966295
Symptom_Awakened_cannot_breathe	0.298884	0.626777
Symptom_Pain_burning_chest	0.294721	0.766905
Symptom_Cognitive_Functioning_executive	0.292747	0.873652
Symptom_Tachycardia	0.292124	0.878357
Symptom_Night_sweats	0.292034	0.691696
Symptom_Ear_ear_pain	0.289797	0.548255
Symptom_Sore_throat	0.288552	0.831234
Symptom_Eye_Vision_floaters	0.285865	0.495383
Symptom_Eye_Vision_dry_eyes	0.284358	0.584264
Symptom_Muscle_aches	0.282441	0.95216
Symptom_Headaches_after_mental_exertion	0.281833	0.555423
Symptom_Phantom_smell	0.269352	0.525112
Symptom_Cognitive_Functioning_thinking	0.26746	0.925637
Symptom_Insomnia	0.264704	0.931097
Symptom_Acid_reflux	0.264029	0.607283
Symptom_Sleep_other	0.259961	0.77856
Symptom_Headaches_base_of_skull	0.258845	0.544416
Symptom_Sneezing	0.255814	0.532612
Symptom_Headaches_behind_eyes	0.25425	0.660176
Symptom_Bulging_veins	0.251736	0.426074
Symptom_Cognitive_Functioning_slowedthoughts	0.251729	0.682693
Symptom_Diarrhea	0.251408	0.800698
Symptom_Gasping_air_normal_oxygen	0.250686	0.812286
Symptom_Skin_rashes	0.247003	0.522643
Symptom_Restless_leg	0.246683	0.431856
Symptom_Heart_palpitations	0.244144	0.897156
Symptom_Ear_changes_to_ear_canal	0.242437	0.469131
Symptom_Waking_up_in_night	0.240653	0.709286
Symptom_Nightmares	0.240109	0.4822
Symptom_Changes_in_voice	0.236797	0.493297
Symptom_Difficulty_falling_asleep	0.236103	0.632858
Symptom_Elevated_temp	0.23122	0.779234
Symptom_Vivid_dreams	0.226773	0.547085
Symptom_Runny_nose	0.224204	0.551465
Symptom_Tightness_of_chest	0.219697	0.89527
Symptom_Eye_Vision_seeing_things_peripheral_vision	0.219311	0.362384
Symptom_Petechiae	0.21819	0.394773
Symptom_Loss_of_appetite	0.216224	0.719511
Symptom_Constipation	0.213879	0.478841
Symptom_Gastrointestinal_hyperactive_bowel	0.211961	0.459073
Symptom_Low_temp	0.211629	0.416243
Symptom_Bladder_control	0.206518	0.375148
Symptom_Gastrointestinal_feeling_full_quickly_eating	0.204508	0.525596
Symptom_Cognitive_Functioning_agnosia	0.201563	0.313387
Symptom_Bradycardia	0.197084	0.363933
Symptom_Altered_taste	0.19706	0.483498
Symptom_Speech_speaking_unrecognizable_words	0.196361	0.296267
Symptom_Eye_Vision_other_eye_issues	0.196098	0.454394
Symptom_Shortness_of_breath	0.195173	0.9236
Symptom_Cognitive_Functioning_attentionconcentration	0.193555	0.93862
Symptom_Reproductive_all_menstrual_issues	0.190182	0.375958
Symptom_Reproductive_other_urinary_issues	0.187352	0.34554
Symptom_Merged_temperature_other_temp_issues	0.187328	0.584834
Symptom_Memory_forget_tasks	0.182376	0.329169
Symptom_Sensations_numbness_one_sided_weakness	0.179548	0.315348
Symptom_Headaches_diffuse	0.179001	0.528656
Symptom_Dry_cough	0.178083	0.808458
Symptom_Temp_lability	0.17579	0.560493
Symptom_Other_ear_hearing_symptoms	0.174193	0.390693
Symptom_Headaches_brain_warmth	0.171296	0.297718
Symptom_Rattling_breath	0.169277	0.350925
Symptom_Change_sensitivity_to_meds	0.169015	0.384993
Symptom_Headaches_migraines	0.164848	0.41753
Symptom_Altered_smell	0.157837	0.39478
Symptom_Waking_up_early	0.156182	0.400068
Symptom_Fever	0.154377	0.453822
Symptom_Headaches_temples	0.154142	0.509168
Symptom_Eye_Vision_bloodshot_eyes	0.152213	0.305179
Symptom_Cough_with_mucus	0.149992	0.442775
Symptom_Hallucinations_visual	0.146316	0.258183
Symptom_Cognitive_Functioning_fastthoughts	0.145709	0.321183
Symptom_SkinAllergy_brittle_nail	0.1412	0.265743
Symptom_Phantom_taste	0.13299	0.24363
Symptom_Hearing_loss	0.131795	0.237217
Symptom_Eye_Vision_pink_eye	0.129432	0.261354
Symptom_Peeling_skin	0.128458	0.269117
Symptom_Lucid_dreams	0.128039	0.290684
Symptom_Heightened_smell	0.127988	0.214961
Symptom_Sleep_apnea	0.125142	0.254538
Symptom_New_allergies	0.122646	0.241093
Symptom_SkinAllergy_heighted_reaction_allergies	0.120498	0.253251
Symptom_Dermatographia	0.118741	0.211742
Symptom_Sensations_facial_pressure_right	0.117691	0.1918
Symptom_Covid_toes	0.11768	0.2623
Symptom_PEM	0.114788	0.991027
Symptom_Vomiting	0.114381	0.271906
Symptom_Hallucinations_auditory	0.114193	0.196847
Symptom_Reproductive_abnormally_irregular_periods	0.10691	0.230535
Symptom_Memory_no_new_memories	0.106196	0.201687
Symptom_Sensations_facial_pressure_left	0.102912	0.193702
Symptom_Reproductive_abnormally_heavy_periods_clotting	0.101288	0.198694
Symptom_Loss_of_taste	0.0997878	0.464763
Symptom_Fainting	0.0955975	0.237808
Symptom_Loss_of_smell	0.0848569	0.483084
Symptom_Eye_Vision_double_vision	0.0789624	0.177352
Symptom_Eye_Vision_redness_outside_eye	0.0755545	0.1748
Symptom_Reproductive_sexual_dysfunction	0.0741462	0.19938
Symptom_Inability_to_yawn	0.0721789	0.128872
Symptom_Headaches_other	0.0708723	0.20979
Symptom_Speech_changes_to_secondary_languages	0.0627652	0.121172
Symptom_Skin_Allergy_other	0.0625855	0.158242
Symptom_Sensations_facial_pressure_other	0.0616934	0.128211
Symptom_Reproductive_other_menstrual_issues	0.0506454	0.143294
Symptom_SkinAllergy_other_itchy	0.040486	0.103325
Symptom_Memory_other	0.0383199	0.16341
Symptom_Cognitive_Functioning_other	0.0372939	0.127907
Symptom_Memory_short	0.0362611	0.959979
Symptom_Respiratory_other	0.0190417	0.108801

## Sheet: Cluster 8
variable	8-dif	8-abs
Symptom_Insomnia	0.339349	1
Symptom_Waking_up_in_night	0.209112	0.680171
Symptom_Difficulty_falling_asleep	0.132537	0.537259
Symptom_Waking_up_early	0.0617479	0.312898
Symptom_Cognitive_Functioning_attentionconcentration	-0.0241696	0.737644
Symptom_Sleep_apnea	-0.0252406	0.115724
Symptom_Cognitive_Functioning_other	-0.032505	0.063477
Symptom_Inability_to_yawn	-0.0364898	0.0285628
Symptom_Loss_of_smell	-0.0435995	0.364509
Symptom_Respiratory_other	-0.0487322	0.0462406
Symptom_Loss_of_taste	-0.0509663	0.325606
Symptom_SkinAllergy_other_itchy	-0.0522416	0.0177302
Symptom_Memory_other	-0.0524114	0.0796579
Symptom_Speech_changes_to_secondary_languages	-0.0569948	0.0106247
Symptom_Sensations_facial_pressure_other	-0.0599128	0.0159594
Symptom_Memory_short	-0.0615804	0.869664
Symptom_Lucid_dreams	-0.0665115	0.111099
Symptom_Memory_no_new_memories	-0.0665694	0.0422114
Symptom_Reproductive_other_menstrual_issues	-0.0710275	0.0309806
Symptom_Restless_leg	-0.0725486	0.13718
Symptom_Phantom_taste	-0.0725602	0.0538921
Symptom_Skin_Allergy_other	-0.0744683	0.0317307
Symptom_Sensations_facial_pressure_right	-0.0745563	0.0143409
Symptom_Vivid_dreams	-0.0751597	0.268378
Symptom_Hallucinations_auditory	-0.0781667	0.0192842
Symptom_Heightened_smell	-0.0798341	0.0231252
Symptom_Headaches_other	-0.0823089	0.0683919
Symptom_Reproductive_abnormally_heavy_periods_clotting	-0.0831734	0.0284218
Symptom_Hearing_loss	-0.0855263	0.0366123
Symptom_Reproductive_sexual_dysfunction	-0.0862922	0.0512826
Symptom_Cognitive_Functioning_fastthoughts	-0.0874179	0.105989
Symptom_Eye_Vision_double_vision	-0.0893068	0.0220262
Symptom_Night_sweats	-0.0929967	0.336283
Symptom_Eye_Vision_redness_outside_eye	-0.0936366	0.018624
Symptom_Sensations_facial_pressure_left	-0.0944809	0.0114924
Symptom_Altered_smell	-0.0966832	0.159839
Symptom_Dermatographia	-0.0994235	0.0103592
Symptom_SkinAllergy_heighted_reaction_allergies	-0.100036	0.0496816
Symptom_Reproductive_abnormally_irregular_periods	-0.100336	0.0392313
Symptom_New_allergies	-0.101763	0.0339467
Symptom_SkinAllergy_brittle_nail	-0.106055	0.0375083
Symptom_Cognitive_Functioning_agnosia	-0.106208	0.0292908
Symptom_Eye_Vision_pink_eye	-0.107254	0.0428752
Symptom_Fainting	-0.110744	0.0473398
Symptom_PEM	-0.111187	0.782434
Symptom_Headaches_brain_warmth	-0.112193	0.0360358
Symptom_Speech_speaking_unrecognizable_words	-0.114292	0.00951111
Symptom_Covid_toes	-0.115824	0.0467577
Symptom_Sensations_numbness_one_sided_weakness	-0.117816	0.0408579
Symptom_Hallucinations_visual	-0.118141	0.0140687
Symptom_Eye_Vision_bloodshot_eyes	-0.127381	0.0470914
Symptom_Nightmares	-0.127844	0.14255
Symptom_Sleep_other	-0.128739	0.41976
Symptom_Peeling_skin	-0.129235	0.0312467
Symptom_Reproductive_other_urinary_issues	-0.13156	0.0511598
Symptom_Bradycardia	-0.132707	0.0595098
Symptom_Rattling_breath	-0.133871	0.0710952
Symptom_Memory_forget_tasks	-0.13608	0.0352097
Symptom_Bladder_control	-0.140236	0.0550665
Symptom_Altered_taste	-0.143751	0.168903
Symptom_Eye_Vision_other_eye_issues	-0.145332	0.139228
Symptom_Eye_Vision_seeing_things_peripheral_vision	-0.150799	0.0207434
Symptom_Cough_with_mucus	-0.151328	0.164633
Symptom_Cognitive_Functioning_thinking	-0.151479	0.538924
Symptom_Vomiting	-0.151795	0.026205
Symptom_Headaches_temples	-0.151872	0.226694
Symptom_Memory_long	-0.152584	0.296961
Symptom_Awakened_cannot_breathe	-0.154076	0.20866
Symptom_Phantom_smell	-0.155081	0.133328
Symptom_Other_ear_hearing_symptoms	-0.158967	0.0831608
Symptom_Reproductive_all_menstrual_issues	-0.160563	0.0521932
Symptom_Cognitive_Functioning_slowedthoughts	-0.161418	0.301327
Symptom_Change_sensitivity_to_meds	-0.163438	0.0781125
Symptom_Headaches_diffuse	-0.163757	0.212263
Symptom_Changes_in_voice	-0.170253	0.117559
Symptom_Cognitive_Functioning_problemsolving	-0.172528	0.414022
Symptom_Petechiae	-0.172577	0.0340656
Symptom_Dry_cough	-0.173335	0.484072
Symptom_Cognitive_Functioning_executive	-0.179123	0.438079
Symptom_Bulging_veins	-0.185449	0.0225184
Symptom_Eye_Vision_floaters	-0.186408	0.0594388
Symptom_Constipation	-0.187375	0.108452
Symptom_Eye_Vision_dry_eyes	-0.18809	0.148158
Symptom_Ear_changes_to_ear_canal	-0.192952	0.067234
Symptom_Low_temp	-0.194391	0.0414565
Symptom_Headaches_migraines	-0.194928	0.0854286
Symptom_Runny_nose	-0.195179	0.164342
Symptom_Gastrointestinal_hyperactive_bowel	-0.198048	0.0806043
Symptom_Slurring_words	-0.198436	0.0135
Symptom_Sneezing	-0.204979	0.107265
Symptom_Fever	-0.207204	0.120054
Symptom_Speech_difficulty_communicating_writing	-0.208969	0.0023224
Symptom_Acute_confusion	-0.210897	0.0260725
Symptom_SkinAllergy_itchy_eyes	-0.215493	0.0832284
Symptom_Shortness_of_breath	-0.216922	0.543205
Symptom_Temp_lability	-0.224587	0.190914
Symptom_Eye_Vision_eye_pressure_pain	-0.227039	0.0837111
Symptom_Skin_rashes	-0.228755	0.0834823
Symptom_Bone_ache_burning	-0.229268	0.0704378
Symptom_Heat_intolerance	-0.229695	0.0924807
Symptom_Headaches_after_mental_exertion	-0.230487	0.0825122
Symptom_Gastrointestinal_feeling_full_quickly_eating	-0.233996	0.120822
Symptom_Sensations_electrical_zaps	-0.235697	0.0706581
Symptom_Extreme_thirst	-0.236016	0.136634
Symptom_Headaches_behind_eyes	-0.239653	0.204265
Symptom_Headaches_base_of_skull	-0.241825	0.0822586
Symptom_Tinnitus	-0.250674	0.138278
Symptom_Ear_ear_pain	-0.251143	0.0489266
Symptom_SkinAllergy_itchy_skin	-0.2578	0.119052
Symptom_Sensations_weakness	-0.258053	0.250668
Symptom_Merged_temperature_other_temp_issues	-0.258755	0.173066
Symptom_Tachycardia	-0.260097	0.368614
Symptom_Speech_difficulty_speaking_complete_sentences	-0.262799	0.0156433
Symptom_Sensations_numbness_loss_sensation	-0.26329	0.15621
Symptom_Headaches_brain_pressure	-0.266883	0.121249
Symptom_Difficulty_swallowing	-0.270047	0.0884507
Symptom_Eye_vision_symptoms	-0.272517	0.132606
Symptom_Elevated_temp	-0.272688	0.314088
Symptom_Headaches_stiff_neck	-0.274307	0.173072
Symptom_Acid_reflux	-0.275484	0.109271
Symptom_Ear_sensitivity_to_noise	-0.276517	0.129264
Symptom_Sore_throat	-0.28035	0.306094
Symptom_Eye_Vision_blurred_vision	-0.281264	0.150429
Symptom_Tightness_of_chest	-0.282455	0.431745
Symptom_Heart_palpitations	-0.287841	0.406093
Symptom_Speech_difficulty_reading_processing_text	-0.292474	0.0182234
Symptom_Speech_difficulty_understanding_others_speech	-0.295232	0.0166069
Symptom_Eye_Vision_sensitivity_to_light	-0.296466	0.0835072
Symptom_Tremors	-0.296877	0.162532
Symptom_Sensations_coldness	-0.297998	0.112893
Symptom_Gasping_air_normal_oxygen	-0.299021	0.304864
Symptom_Muscle_spasms	-0.299723	0.0945611
Symptom_Pain_burning_chest	-0.302869	0.215283
Symptom_Neuralgia	-0.31014	0.0649538
Symptom_Vibrating_sensations	-0.310314	0.159089
Symptom_Loss_of_appetite	-0.312328	0.231617
Symptom_Speech_difficulty_communicating_verbally	-0.316894	0.0375251
Symptom_Muscle_aches	-0.323344	0.392974
Symptom_Joint_pain	-0.325589	0.270244
Symptom_Sensations_tingling_prickling	-0.332588	0.206402
Symptom_Gastrointestinal_abdominal_pain	-0.339901	0.129428
Symptom_Sensations_skin_burning_no_rash	-0.351157	0.171387
Symptom_Chills_flushing_sweats	-0.365779	0.227441
Symptom_Dizziness_vertigo	-0.371791	0.345435
Symptom_Diarrhea	-0.373618	0.223751
Symptom_Speech_difficulty_finding_words	-0.38408	0.154352
Symptom_Nausea	-0.430578	0.090883

## Sheet: Cluster 9
variable	9-dif	9-abs
Symptom_Memory_short	-0.0408644	0.888786
Symptom_PEM	-0.0430808	0.845302
Symptom_Cognitive_Functioning_attentionconcentration	0.0649418	0.819901
Symptom_Cognitive_Functioning_thinking	0.0348139	0.710886
Symptom_Shortness_of_breath	-0.120213	0.632475
Symptom_Cognitive_Functioning_executive	-0.0111059	0.593172
Symptom_Cognitive_Functioning_problemsolving	-0.0249128	0.550282
Symptom_Tightness_of_chest	-0.157511	0.547078
Symptom_Muscle_aches	-0.159407	0.544301
Symptom_Dry_cough	-0.133785	0.52058
Symptom_Dizziness_vertigo	-0.223599	0.482228
Symptom_Heart_palpitations	-0.210565	0.477424
Symptom_Gasping_air_normal_oxygen	-0.195942	0.400014
Symptom_Cognitive_Functioning_slowedthoughts	-0.0569649	0.397744
Symptom_Tachycardia	-0.247933	0.379843
Symptom_Sore_throat	-0.208106	0.372781
Symptom_Joint_pain	-0.249044	0.340901
Symptom_Loss_of_smell	-0.0826048	0.328504
Symptom_Headaches_behind_eyes	-0.10881	0.325044
Symptom_Memory_long	-0.123238	0.324049
Symptom_Diarrhea	-0.265001	0.324013
Symptom_Speech_difficulty_finding_words	-0.222037	0.30393
Symptom_Sensations_weakness	-0.201071	0.303267
Symptom_Sleep_other	-0.25857	0.299916
Symptom_Elevated_temp	-0.291406	0.29681
Symptom_Pain_burning_chest	-0.217918	0.293699
Symptom_Loss_of_taste	-0.0905296	0.289086
Symptom_Chills_flushing_sweats	-0.304582	0.28393
Symptom_Headaches_temples	-0.0942682	0.279866
Symptom_Loss_of_appetite	-0.264195	0.276048
Symptom_Sensations_tingling_prickling	-0.268572	0.265494
Symptom_Headaches_diffuse	-0.106804	0.264836
Symptom_Headaches_stiff_neck	-0.196216	0.245156
Symptom_Runny_nose	-0.111252	0.241813
Symptom_Nausea	-0.27779	0.231918
Symptom_Merged_temperature_other_temp_issues	-0.207026	0.220816
Symptom_Cough_with_mucus	-0.092266	0.219151
Symptom_Headaches_brain_pressure	-0.161424	0.218596
Symptom_Vibrating_sensations	-0.251611	0.213276
Symptom_Sensations_skin_burning_no_rash	-0.318895	0.201168
Symptom_Temp_lability	-0.213977	0.200708
Symptom_Tremors	-0.278543	0.179456
Symptom_Headaches_base_of_skull	-0.142571	0.173878
Symptom_Altered_taste	-0.140478	0.171925
Symptom_Sensations_numbness_loss_sensation	-0.250992	0.167562
Symptom_Fever	-0.165262	0.15877
Symptom_Ear_sensitivity_to_noise	-0.249532	0.154174
Symptom_Tinnitus	-0.234501	0.153206
Symptom_Sensations_coldness	-0.255374	0.152238
Symptom_Headaches_after_mental_exertion	-0.155087	0.152112
Symptom_Headaches_migraines	-0.12425	0.15067
Symptom_Sneezing	-0.161101	0.147767
Symptom_Acid_reflux	-0.235322	0.146344
Symptom_Gastrointestinal_abdominal_pain	-0.335375	0.133606
Symptom_Speech_difficulty_communicating_verbally	-0.214277	0.132249
Symptom_Altered_smell	-0.127815	0.131101
Symptom_Eye_Vision_blurred_vision	-0.304973	0.128544
Symptom_Cognitive_Functioning_fastthoughts	-0.0647994	0.126867
Symptom_Eye_vision_symptoms	-0.280198	0.125516
Symptom_Gastrointestinal_feeling_full_quickly_eating	-0.229074	0.125366
Symptom_Memory_other	-0.00760342	0.121019
Symptom_Difficulty_swallowing	-0.23668	0.119252
Symptom_Eye_Vision_sensitivity_to_light	-0.257968	0.119043
Symptom_Eye_Vision_other_eye_issues	-0.168401	0.117935
Symptom_Extreme_thirst	-0.259418	0.115033
Symptom_Skin_rashes	-0.196235	0.113501
Symptom_Other_ear_hearing_symptoms	-0.126697	0.112948
Symptom_Changes_in_voice	-0.176569	0.111729
Symptom_Phantom_smell	-0.17916	0.111101
Symptom_Neuralgia	-0.265124	0.106507
Symptom_Ear_ear_pain	-0.192713	0.102861
Symptom_Eye_Vision_dry_eyes	-0.237199	0.102827
Symptom_Constipation	-0.193743	0.102574
Symptom_Muscle_spasms	-0.293705	0.100116
Symptom_SkinAllergy_itchy_skin	-0.282236	0.0964957
Symptom_Bone_ache_burning	-0.203388	0.0943271
Symptom_Eye_Vision_eye_pressure_pain	-0.216159	0.0937542
Symptom_Bradycardia	-0.102889	0.0870343
Symptom_Ear_changes_to_ear_canal	-0.17198	0.0865929
Symptom_Headaches_other	-0.0636464	0.0856189
Symptom_SkinAllergy_itchy_eyes	-0.218169	0.0807585
Symptom_Night_sweats	-0.37231	0.0784555
Symptom_Vivid_dreams	-0.282919	0.0766006
Symptom_Change_sensitivity_to_meds	-0.167047	0.0747816
Symptom_Memory_forget_tasks	-0.0984195	0.0699735
Symptom_Awakened_cannot_breathe	-0.305677	0.0687203
Symptom_Eye_Vision_floaters	-0.17696	0.0681601
Symptom_Gastrointestinal_hyperactive_bowel	-0.211742	0.0679633
Symptom_Speech_difficulty_reading_processing_text	-0.241758	0.0650384
Symptom_Reproductive_all_menstrual_issues	-0.146775	0.0649202
Symptom_Heat_intolerance	-0.260025	0.0644842
Symptom_Respiratory_other	-0.0309116	0.0626904
Symptom_Acute_confusion	-0.171704	0.0622511
Symptom_Rattling_breath	-0.14387	0.0618658
Symptom_Sensations_electrical_zaps	-0.24523	0.0618579
Symptom_Fainting	-0.095471	0.0614375
Symptom_SkinAllergy_heighted_reaction_allergies	-0.0883147	0.0605015
Symptom_Speech_difficulty_speaking_complete_sentences	-0.214409	0.0603103
Symptom_Low_temp	-0.176533	0.0579407
Symptom_Petechiae	-0.148141	0.0566216
Symptom_Eye_Vision_pink_eye	-0.0932606	0.0557918
Symptom_Speech_difficulty_understanding_others_speech	-0.253118	0.0554819
Symptom_Cognitive_Functioning_other	-0.0437287	0.0531167
Symptom_Reproductive_other_urinary_issues	-0.129499	0.0530623
Symptom_Covid_toes	-0.110294	0.0518624
Symptom_Reproductive_other_menstrual_issues	-0.0484478	0.0518234
Symptom_Headaches_brain_warmth	-0.0983376	0.0488255
Symptom_Reproductive_sexual_dysfunction	-0.0891202	0.0486722
Symptom_Skin_Allergy_other	-0.057567	0.0473319
Symptom_Reproductive_abnormally_irregular_periods	-0.0925248	0.0464414
Symptom_Vomiting	-0.132018	0.0444609
Symptom_Bulging_veins	-0.16175	0.044395
Symptom_Hearing_loss	-0.0778006	0.0437437
Symptom_Slurring_words	-0.167149	0.0423805
Symptom_Hallucinations_visual	-0.0906317	0.0394622
Symptom_Eye_Vision_bloodshot_eyes	-0.13644	0.0387299
Symptom_Nightmares	-0.240687	0.0383881
Symptom_Peeling_skin	-0.121595	0.0382987
Symptom_Reproductive_abnormally_heavy_periods_clotting	-0.0729262	0.0378808
Symptom_Insomnia	-0.703664	0.0372193
Symptom_Bladder_control	-0.160741	0.0361391
Symptom_Eye_Vision_seeing_things_peripheral_vision	-0.134206	0.0360601
Symptom_Lucid_dreams	-0.148347	0.0355583
Symptom_Cognitive_Functioning_agnosia	-0.100539	0.0345237
Symptom_Phantom_taste	-0.0946611	0.0334912
Symptom_Memory_no_new_memories	-0.0761783	0.0333417
Symptom_New_allergies	-0.103016	0.0327898
Symptom_SkinAllergy_other_itchy	-0.0367236	0.0320546
Symptom_SkinAllergy_brittle_nail	-0.113626	0.0305192
Symptom_Speech_difficulty_communicating_writing	-0.178922	0.0300576
Symptom_Sensations_numbness_one_sided_weakness	-0.13009	0.0295282
Symptom_Sensations_facial_pressure_left	-0.0758186	0.0287192
Symptom_Sensations_facial_pressure_right	-0.0632797	0.02475
Symptom_Sensations_facial_pressure_other	-0.0513129	0.0238978
Symptom_Hallucinations_auditory	-0.0752127	0.0220109
Symptom_Heightened_smell	-0.0811421	0.0219177
Symptom_Eye_Vision_redness_outside_eye	-0.0900847	0.0219027
Symptom_Speech_speaking_unrecognizable_words	-0.103774	0.0192196
Symptom_Speech_changes_to_secondary_languages	-0.048467	0.0184965
Symptom_Inability_to_yawn	-0.0493358	0.0167049
Symptom_Restless_leg	-0.203677	0.0161386
Symptom_Dermatographia	-0.0938795	0.0154767
Symptom_Eye_Vision_double_vision	-0.0997893	0.01235
Symptom_Sleep_apnea	-0.137496	0.0121037
Symptom_Waking_up_early	-0.277224	1e-15
Symptom_Difficulty_falling_asleep	-0.449494	1e-15
Symptom_Waking_up_in_night	-0.52774	1e-15

[truncated: 3 more sheets: Cluster 10, Cluster 11, Cluster 12]
