# Supplementary material for: Multi-method phenotyping of Long COVID patients using high-dimensional symptom data
Source: Research Square preprint supplement (doi:10.21203/rs.3.rs-4901463/v1), 2024-10-02
Supplement: Supplementary file 3 [file 2fa456319108772ab3570c00.xlsx]

## Sheet: full_symptom_table
Symptom	Population	0		1		2		3		4		5		6		7
		δ	f	δ	f	δ	f	δ	f	δ	f	δ	f	δ	f	δ	f
Fatigue	0.979	0.021	1	-0.012	0.968	0.017	0.996	0.018	0.997	-0.07	0.91	0.014	0.993	0.016	0.995	0.016	0.996
Memory_short	0.924	0.035	0.959	0.005	0.929	0.044	0.968	-0.021	0.903	-0.028	0.896	-0.001	0.923	0.038	0.962	-0.032	0.893
PEM	0.884	0.084	0.967	-0.005	0.878	0.11	0.994	0.03	0.914	-0.308	0.576	0.074	0.957	0.097	0.98	0.033	0.917
Cognitive_Functioning_attentionconcentration	0.753	0.216	0.969	-0.365	0.388	0.229	0.982	0.167	0.92	-0.356	0.397	0.125	0.878	0.191	0.944	-0.01	0.743
Shortness_of_breath	0.737	0.105	0.842	0.088	0.825	0.192	0.929	-0.114	0.623	-0.436	0.301	0.134	0.871	0.167	0.903	0.106	0.843
Insomnia	0.693	0.084	0.777	-0.12	0.573	0.269	0.962	-0.087	0.606	-0.298	0.396	0.193	0.886	0.21	0.903	0.012	0.705
Tightness_of_chest	0.68	0.061	0.741	0.128	0.808	0.237	0.917	-0.172	0.508	-0.443	0.237	0.167	0.847	0.194	0.874	0.105	0.785
Muscle_aches	0.677	0.094	0.771	-0.166	0.511	0.297	0.974	-0.107	0.57	-0.311	0.366	0.188	0.865	0.231	0.908	0.074	0.751
Dizziness_vertigo	0.673	0.147	0.82	-0.206	0.467	0.298	0.97	-0.086	0.586	-0.339	0.334	0.194	0.867	0.277	0.949	0.034	0.706
Cognitive_Functioning_thinking	0.666	0.295	0.961	-0.464	0.202	0.3	0.966	0.244	0.91	-0.427	0.239	0.111	0.777	0.242	0.908	-0.067	0.599
Heart_palpitations	0.656	0.127	0.784	0.004	0.661	0.255	0.911	-0.171	0.485	-0.38	0.276	0.206	0.862	0.231	0.887	0.036	0.692
Dry_cough	0.636	0.091	0.727	-0.012	0.624	0.188	0.824	-0.104	0.532	-0.267	0.369	0.055	0.691	0.133	0.769	0.127	0.763
Tachycardia	0.592	0.068	0.66	-0.009	0.584	0.315	0.907	-0.169	0.424	-0.367	0.225	0.184	0.776	0.262	0.854	0.035	0.627
Cognitive_Functioning_executive	0.589	0.346	0.935	-0.464	0.125	0.336	0.925	0.26	0.849	-0.42	0.169	0.051	0.64	0.256	0.845	-0.124	0.465
Gasping_air_normal_oxygen	0.566	0.091	0.657	0.04	0.607	0.258	0.824	-0.163	0.404	-0.416	0.15	0.175	0.741	0.216	0.782	0.096	0.662
Cognitive_Functioning_problemsolving	0.557	0.337	0.894	-0.43	0.127	0.36	0.917	0.241	0.798	-0.425	0.132	0.008	0.565	0.299	0.856	-0.132	0.425
Sore_throat	0.552	0.082	0.634	-0.033	0.518	0.326	0.877	-0.182	0.37	-0.274	0.277	0.124	0.675	0.176	0.728	0.085	0.637
Diarrhea	0.551	-0.005	0.546	-0.035	0.516	0.297	0.848	-0.214	0.338	-0.258	0.293	0.187	0.739	0.246	0.797	0.089	0.64
Elevated_temp	0.55	0.103	0.654	-0.172	0.378	0.276	0.826	-0.294	0.256	-0.266	0.284	0.203	0.754	0.253	0.804	0.29	0.84
Joint_pain	0.547	0.066	0.613	-0.162	0.385	0.392	0.939	-0.151	0.395	-0.26	0.286	0.182	0.729	0.291	0.838	-0.014	0.532
Chills_flushing_sweats	0.543	0.091	0.634	-0.159	0.384	0.374	0.917	-0.265	0.278	-0.313	0.23	0.193	0.736	0.308	0.851	0.189	0.732
Sleep_other	0.528	0.135	0.663	-0.157	0.372	0.286	0.814	-0.074	0.454	-0.244	0.284	0.126	0.655	0.197	0.725	-0.006	0.523
Loss_of_appetite	0.499	0.06	0.559	-0.095	0.404	0.331	0.83	-0.189	0.31	-0.249	0.25	0.143	0.642	0.196	0.696	0.118	0.617
Speech_difficulty_finding_words	0.485	0.492	0.977	-0.322	0.163	0.464	0.949	0.065	0.55	-0.301	0.184	-0.178	0.307	0.338	0.823	-0.195	0.29
Waking_up_in_night	0.483	0.118	0.602	-0.144	0.339	0.293	0.777	-0.102	0.381	-0.263	0.22	0.16	0.644	0.214	0.697	0.005	0.489
Sensations_tingling_prickling	0.481	-0.048	0.433	-0.091	0.39	0.404	0.885	-0.139	0.342	-0.235	0.246	0.194	0.675	0.323	0.804	-0.101	0.38
Pain_burning_chest	0.473	0.015	0.488	0.095	0.568	0.355	0.828	-0.219	0.254	-0.378	0.095	0.189	0.662	0.211	0.684	0.055	0.528
Nausea	0.464	0.069	0.533	-0.135	0.329	0.412	0.875	-0.201	0.262	-0.289	0.175	0.214	0.678	0.279	0.743	0.028	0.492
Sensations_weakness	0.462	0.074	0.537	-0.153	0.31	0.382	0.844	-0.084	0.378	-0.246	0.216	0.118	0.58	0.266	0.728	-0.061	0.401
Sensations_skin_burning_no_rash	0.457	-0.044	0.413	-0.156	0.302	0.466	0.923	-0.153	0.304	-0.189	0.268	0.18	0.637	0.353	0.81	-0.115	0.342
Cognitive_Functioning_slowedthoughts	0.43	0.295	0.725	-0.256	0.174	0.325	0.755	0.067	0.498	-0.254	0.176	-0.012	0.418	0.215	0.645	-0.132	0.298
Memory_long	0.415	0.349	0.764	-0.337	0.078	0.415	0.83	0.111	0.526	-0.261	0.154	-0.088	0.327	0.243	0.658	-0.15	0.266
Gastrointestinal_abdominal_pain	0.413	-0.008	0.405	-0.081	0.333	0.47	0.883	-0.205	0.208	-0.249	0.165	0.192	0.605	0.269	0.682	-0.028	0.386
Vibrating_sensations	0.41	-0.028	0.382	-0.072	0.338	0.406	0.816	-0.153	0.257	-0.232	0.178	0.208	0.618	0.287	0.697	-0.11	0.299
Difficulty_falling_asleep	0.406	0.128	0.533	-0.133	0.273	0.324	0.729	-0.101	0.305	-0.233	0.172	0.12	0.525	0.216	0.622	-0.04	0.366
Tremors	0.403	-0.018	0.385	-0.063	0.341	0.421	0.824	-0.154	0.25	-0.229	0.175	0.173	0.576	0.317	0.72	-0.132	0.271
Headaches_behind_eyes	0.402	0.021	0.423	-0.17	0.232	0.365	0.767	-0.052	0.349	-0.183	0.219	0.164	0.565	0.178	0.579	-0.08	0.322
Night_sweats	0.4	0.05	0.45	-0.162	0.239	0.384	0.785	-0.151	0.25	-0.25	0.15	0.199	0.6	0.241	0.642	0.018	0.418
Headaches_stiff_neck	0.4	0.067	0.467	-0.188	0.212	0.438	0.838	-0.097	0.303	-0.229	0.171	0.126	0.525	0.284	0.684	-0.076	0.323
Loss_of_smell	0.392	0.057	0.449	-0.196	0.196	0.163	0.555	-0.047	0.345	0.053	0.445	-0.087	0.305	0.063	0.455	0.118	0.51
Merged_temperature_other_temp_issues	0.391	0.064	0.455	-0.04	0.351	0.277	0.668	-0.127	0.264	-0.19	0.201	0.111	0.502	0.167	0.558	-0.027	0.364
Temp_lability	0.379	0.071	0.45	-0.173	0.206	0.287	0.666	-0.213	0.167	-0.203	0.176	0.098	0.477	0.191	0.57	0.266	0.645
Eye_Vision_blurred_vision	0.371	0.112	0.483	-0.181	0.19	0.489	0.86	-0.113	0.258	-0.246	0.125	0.095	0.466	0.316	0.687	-0.11	0.261
Sensations_numbness_loss_sensation	0.362	-0.053	0.309	-0.119	0.243	0.45	0.812	-0.109	0.253	-0.202	0.16	0.155	0.517	0.287	0.65	-0.112	0.25
Loss_of_taste	0.358	0.05	0.408	-0.174	0.185	0.203	0.561	-0.06	0.299	0.024	0.382	-0.076	0.282	0.058	0.416	0.116	0.475
Sensations_coldness	0.353	-0.019	0.333	-0.129	0.224	0.434	0.787	-0.132	0.221	-0.198	0.154	0.107	0.459	0.286	0.638	-0.038	0.315
Ear_sensitivity_to_noise	0.351	0.099	0.45	-0.199	0.153	0.493	0.844	-0.067	0.284	-0.211	0.14	0.044	0.395	0.294	0.645	-0.122	0.229
Headaches_temples	0.348	0.045	0.393	-0.151	0.197	0.262	0.611	-0.058	0.29	-0.142	0.206	0.103	0.451	0.159	0.507	-0.015	0.333
Eye_vision_symptoms	0.347	0.071	0.418	-0.162	0.185	0.497	0.844	-0.101	0.246	-0.222	0.125	0.078	0.425	0.314	0.661	-0.134	0.213
Headaches_diffuse	0.344	0.048	0.392	-0.131	0.212	0.303	0.646	-0.002	0.341	-0.183	0.16	0.087	0.431	0.111	0.455	-0.048	0.295
Acid_reflux	0.341	0.018	0.359	-0.029	0.312	0.35	0.692	-0.16	0.181	-0.196	0.145	0.136	0.477	0.158	0.499	-0.011	0.331
Tinnitus	0.341	-0.008	0.333	-0.104	0.237	0.449	0.791	-0.088	0.253	-0.18	0.161	0.07	0.411	0.243	0.584	-0.107	0.234
Headaches_brain_pressure	0.336	0.04	0.376	-0.198	0.138	0.443	0.779	-0.034	0.302	-0.21	0.126	0.116	0.453	0.242	0.578	-0.119	0.218
Muscle_spasms	0.334	0.009	0.343	-0.137	0.197	0.492	0.826	-0.146	0.188	-0.217	0.117	0.143	0.477	0.306	0.64	-0.102	0.232
Awakened_cannot_breathe	0.331	0.011	0.341	-0.065	0.266	0.365	0.696	-0.16	0.171	-0.262	0.069	0.197	0.528	0.227	0.558	-0.01	0.321
Runny_nose	0.328	0.045	0.372	-0.104	0.224	0.301	0.628	-0.102	0.225	-0.09	0.238	0.046	0.374	0.114	0.442	0.001	0.329
Extreme_thirst	0.327	-0.004	0.324	-0.082	0.245	0.412	0.739	-0.129	0.198	-0.217	0.11	0.113	0.44	0.226	0.553	-0.028	0.299
Vivid_dreams	0.321	0.074	0.395	-0.145	0.175	0.335	0.656	-0.048	0.272	-0.187	0.134	0.104	0.425	0.17	0.491	-0.069	0.251
SkinAllergy_itchy_skin	0.318	-0.027	0.291	-0.139	0.179	0.456	0.775	-0.117	0.201	-0.139	0.179	0.052	0.37	0.276	0.594	-0.064	0.254
Neuralgia	0.314	-0.044	0.27	-0.124	0.19	0.518	0.832	-0.142	0.173	-0.206	0.108	0.144	0.458	0.303	0.617	-0.108	0.206
Eye_Vision_sensitivity_to_light	0.314	0.102	0.416	-0.211	0.103	0.552	0.866	-0.091	0.223	-0.224	0.09	0.06	0.374	0.305	0.619	-0.126	0.188
Gastrointestinal_feeling_full_quickly_eating	0.312	0.021	0.333	-0.056	0.257	0.314	0.626	-0.133	0.179	-0.146	0.167	0.1	0.413	0.157	0.47	-0.023	0.29
Speech_difficulty_communicating_verbally	0.306	0.477	0.784	-0.253	0.053	0.502	0.808	0.02	0.327	-0.237	0.069	-0.199	0.107	0.245	0.552	-0.203	0.103
Difficulty_swallowing	0.306	-0.024	0.281	-0.068	0.237	0.437	0.743	-0.11	0.195	-0.209	0.097	0.075	0.381	0.228	0.534	-0.049	0.257
Fever	0.299	0.09	0.389	-0.142	0.157	0.209	0.508	-0.182	0.117	-0.182	0.117	0.07	0.369	0.161	0.46	0.249	0.548
Cough_with_mucus	0.291	0.036	0.327	-0.042	0.249	0.209	0.5	-0.096	0.195	-0.104	0.187	0.017	0.308	0.107	0.398	0.041	0.332
Eye_Vision_dry_eyes	0.288	-0.021	0.267	-0.088	0.2	0.414	0.702	-0.088	0.2	-0.162	0.126	0.046	0.334	0.19	0.478	-0.041	0.247
Headaches_base_of_skull	0.282	0.021	0.302	-0.133	0.149	0.355	0.636	-0.074	0.208	-0.163	0.118	0.11	0.392	0.208	0.489	-0.081	0.201
Altered_taste	0.279	0.09	0.369	-0.131	0.148	0.338	0.617	-0.086	0.193	-0.013	0.266	-0.042	0.237	0.081	0.36	-0.033	0.246
Heat_intolerance	0.277	0.043	0.32	-0.142	0.135	0.409	0.686	-0.122	0.156	-0.176	0.101	0.085	0.362	0.255	0.532	-0.051	0.226
Sneezing	0.273	0	0.273	-0.086	0.187	0.387	0.66	-0.104	0.169	-0.119	0.154	0.028	0.301	0.126	0.399	0.004	0.277
Headaches_after_mental_exertion	0.268	0.151	0.42	-0.197	0.071	0.412	0.68	-0.035	0.233	-0.223	0.045	0.063	0.331	0.215	0.483	-0.1	0.168
Skin_rashes	0.263	-0.019	0.244	-0.057	0.206	0.367	0.63	-0.089	0.174	-0.131	0.132	0.028	0.292	0.161	0.424	-0.04	0.223
Speech_difficulty_understanding_others_speech	0.26	0.431	0.691	-0.246	0.014	0.531	0.791	-0.014	0.246	-0.221	0.038	-0.191	0.069	0.262	0.522	-0.183	0.076
Speech_difficulty_reading_processing_text	0.259	0.417	0.676	-0.232	0.028	0.513	0.773	-0.01	0.25	-0.222	0.037	-0.167	0.092	0.269	0.529	-0.21	0.049
Eye_Vision_eye_pressure_pain	0.259	0.011	0.27	-0.137	0.123	0.476	0.735	-0.114	0.146	-0.165	0.095	0.082	0.341	0.212	0.471	-0.064	0.195
Constipation	0.258	0.018	0.276	-0.07	0.188	0.291	0.549	-0.096	0.162	-0.142	0.116	0.068	0.326	0.21	0.468	-0.06	0.198
Eye_Vision_other_eye_issues	0.251	0.036	0.288	-0.051	0.201	0.264	0.516	-0.054	0.197	-0.089	0.162	0.006	0.257	0.096	0.347	-0.051	0.201
Bone_ache_burning	0.251	-0.018	0.233	-0.12	0.131	0.421	0.672	-0.124	0.127	-0.161	0.09	0.104	0.355	0.243	0.494	-0.059	0.192
Sensations_electrical_zaps	0.251	-0.044	0.207	-0.101	0.15	0.447	0.698	-0.111	0.14	-0.142	0.109	0.103	0.354	0.238	0.489	-0.118	0.133
Changes_in_voice	0.251	-0.023	0.228	-0.043	0.208	0.301	0.551	-0.071	0.179	-0.149	0.101	0.018	0.268	0.17	0.421	-0.009	0.242
Phantom_smell	0.249	0.042	0.291	-0.136	0.112	0.395	0.644	-0.108	0.141	-0.039	0.21	-0.026	0.223	0.128	0.376	-0.017	0.232
Ear_ear_pain	0.247	-0.039	0.208	-0.078	0.169	0.449	0.696	-0.108	0.138	-0.169	0.078	0.083	0.33	0.162	0.409	-0.035	0.212
Waking_up_early	0.246	0.059	0.306	-0.079	0.167	0.226	0.472	-0.063	0.183	-0.129	0.117	0.058	0.304	0.115	0.362	-0.015	0.232
SkinAllergy_itchy_eyes	0.245	-0.026	0.22	-0.121	0.124	0.49	0.735	-0.106	0.139	-0.119	0.126	0.036	0.281	0.185	0.43	-0.061	0.184
Headaches_migraines	0.241	0.009	0.25	-0.123	0.118	0.306	0.547	-0.037	0.205	-0.144	0.097	0.094	0.336	0.148	0.39	-0.061	0.181
Nightmares	0.241	0.05	0.291	-0.105	0.136	0.352	0.593	-0.076	0.166	-0.163	0.078	0.059	0.3	0.168	0.409	-0.048	0.194
Gastrointestinal_hyperactive_bowel	0.239	-0.04	0.198	-0.086	0.153	0.305	0.543	-0.113	0.126	-0.125	0.114	0.09	0.329	0.198	0.437	-0.008	0.23
Speech_difficulty_speaking_complete_sentences	0.234	0.33	0.564	-0.202	0.032	0.479	0.713	0.011	0.245	-0.197	0.037	-0.158	0.076	0.201	0.435	-0.162	0.072
Altered_smell	0.227	0.053	0.28	-0.134	0.093	0.297	0.524	-0.081	0.146	0.028	0.255	-0.03	0.197	0.053	0.28	-0.016	0.21
Ear_changes_to_ear_canal	0.216	-0.056	0.159	-0.07	0.146	0.395	0.611	-0.096	0.119	-0.106	0.109	0.064	0.279	0.128	0.344	-0.04	0.175
Change_sensitivity_to_meds	0.209	0.001	0.21	-0.046	0.163	0.263	0.472	-0.053	0.156	-0.104	0.105	0.05	0.259	0.112	0.321	-0.066	0.143
Other_ear_hearing_symptoms	0.207	0.006	0.213	-0.053	0.155	0.283	0.49	-0.051	0.157	-0.078	0.13	0.009	0.216	0.069	0.277	-0.034	0.174
Eye_Vision_floaters	0.204	0.003	0.207	-0.092	0.112	0.381	0.585	-0.079	0.125	-0.131	0.073	0.045	0.249	0.172	0.376	-0.07	0.134
Low_temp	0.194	-0.012	0.182	-0.06	0.134	0.326	0.52	-0.12	0.074	-0.124	0.07	0.07	0.264	0.163	0.357	-0.018	0.177
Acute_confusion	0.194	0.049	0.242	-0.155	0.039	0.451	0.644	-0.038	0.156	-0.157	0.036	-0.006	0.187	0.176	0.37	-0.064	0.13
Restless_leg	0.19	0.013	0.203	-0.091	0.099	0.273	0.462	-0.062	0.128	-0.118	0.072	0.049	0.239	0.183	0.373	-0.058	0.131
Reproductive_all_menstrual_issues	0.184	-0.011	0.172	-0.045	0.139	0.226	0.409	-0.073	0.11	-0.092	0.091	0.043	0.227	0.139	0.322	-0.031	0.153
Rattling_breath	0.175	0.015	0.19	-0.059	0.116	0.256	0.431	-0.083	0.092	-0.113	0.062	0.038	0.213	0.103	0.278	0.019	0.194
Cognitive_Functioning_fastthoughts	0.173	0.084	0.257	-0.115	0.058	0.22	0.393	-0.006	0.167	-0.102	0.071	0.007	0.18	0.094	0.267	-0.039	0.134
Speech_difficulty_communicating_writing	0.167	0.273	0.441	-0.147	0.021	0.435	0.603	-0.015	0.152	-0.149	0.018	-0.127	0.04	0.137	0.304	-0.145	0.023
Slurring_words	0.167	0.105	0.272	-0.12	0.047	0.428	0.595	-0.05	0.117	-0.133	0.034	-0.065	0.102	0.196	0.363	-0.106	0.061
Bulging_veins	0.165	-0.059	0.106	-0.031	0.134	0.341	0.506	-0.094	0.071	-0.121	0.044	0.055	0.22	0.166	0.331	-0.056	0.109
Bradycardia	0.164	-0.034	0.13	-0.026	0.139	0.267	0.431	-0.058	0.107	-0.11	0.054	0.063	0.227	0.096	0.26	-0.048	0.116
Petechiae	0.163	-0.043	0.12	-0.045	0.118	0.341	0.504	-0.09	0.073	-0.098	0.065	0.028	0.191	0.143	0.306	-0.04	0.123
Bladder_control	0.157	-0.017	0.14	-0.083	0.073	0.333	0.49	-0.049	0.108	-0.087	0.07	0.005	0.162	0.116	0.273	-0.041	0.116
Lucid_dreams	0.157	0.021	0.177	-0.073	0.084	0.219	0.375	-0.023	0.134	-0.089	0.068	0.024	0.18	0.09	0.247	-0.039	0.117
Reproductive_other_urinary_issues	0.154	0.017	0.171	-0.061	0.093	0.256	0.409	-0.062	0.091	-0.08	0.073	0.006	0.16	0.099	0.252	-0.017	0.137
Vomiting	0.15	0.013	0.163	-0.06	0.089	0.198	0.348	-0.086	0.064	-0.09	0.06	0.056	0.206	0.109	0.259	0.017	0.167
Eye_Vision_bloodshot_eyes	0.141	-0.003	0.138	-0.062	0.079	0.244	0.385	-0.065	0.076	-0.081	0.06	0.04	0.182	0.114	0.255	-0.032	0.109
Memory_forget_tasks	0.138	0.114	0.252	-0.112	0.026	0.321	0.458	0.001	0.138	-0.101	0.037	-0.033	0.105	0.062	0.2	-0.084	0.054
Eye_Vision_seeing_things_peripheral_vision	0.134	0.022	0.156	-0.095	0.039	0.335	0.468	-0.054	0.08	-0.096	0.037	0.001	0.135	0.127	0.26	-0.047	0.086
Headaches_other	0.133	0.039	0.172	-0.023	0.11	0.128	0.261	-0.024	0.11	-0.025	0.108	-0.011	0.122	0.017	0.151	-0.032	0.102
Covid_toes	0.129	0.011	0.14	-0.044	0.085	0.219	0.348	-0.051	0.078	-0.067	0.062	-0.002	0.127	0.089	0.218	-0.022	0.107
Sensations_numbness_one_sided_weakness	0.128	-0.018	0.111	-0.036	0.092	0.235	0.364	-0.05	0.078	-0.089	0.039	0.044	0.172	0.112	0.241	-0.06	0.068
Fainting	0.128	0.014	0.141	-0.05	0.078	0.224	0.352	-0.034	0.093	-0.089	0.038	0.021	0.149	0.085	0.213	-0.04	0.088
Eye_Vision_pink_eye	0.127	-0.012	0.115	-0.042	0.085	0.165	0.292	-0.053	0.074	-0.055	0.072	0.035	0.162	0.089	0.216	-0.018	0.109
Sleep_apnea	0.126	0.007	0.133	-0.047	0.079	0.176	0.302	-0.044	0.082	-0.066	0.06	0.011	0.138	0.093	0.219	-0.015	0.112
Peeling_skin	0.126	-0.001	0.125	-0.054	0.072	0.248	0.374	-0.051	0.075	-0.069	0.057	0.007	0.133	0.082	0.208	-0.023	0.103
SkinAllergy_heighted_reaction_allergies	0.124	-0.007	0.117	-0.036	0.088	0.21	0.334	-0.039	0.085	-0.055	0.069	-0.004	0.12	0.084	0.208	-0.039	0.085
Reproductive_abnormally_irregular_periods	0.121	-0.01	0.111	-0.02	0.101	0.152	0.273	-0.05	0.071	-0.069	0.052	0.035	0.155	0.072	0.193	-0.009	0.112
Headaches_brain_warmth	0.121	-0.002	0.119	-0.064	0.056	0.279	0.399	-0.034	0.087	-0.082	0.038	0.031	0.151	0.059	0.18	-0.046	0.075
Memory_other	0.12	0.056	0.176	-0.056	0.064	0.074	0.194	0.01	0.13	-0.02	0.1	-0.022	0.098	0.009	0.129	-0.008	0.112
Reproductive_sexual_dysfunction	0.113	0.029	0.141	-0.057	0.056	0.176	0.289	0.008	0.121	-0.07	0.043	-0.024	0.089	0.062	0.175	-0.035	0.078
New_allergies	0.111	0.006	0.117	-0.032	0.079	0.185	0.296	-0.037	0.074	-0.051	0.06	0.004	0.116	0.074	0.185	-0.045	0.066
SkinAllergy_brittle_nail	0.109	-0.027	0.083	-0.052	0.057	0.29	0.399	-0.037	0.072	-0.06	0.05	-0.006	0.103	0.066	0.175	-0.037	0.072
Cognitive_Functioning_agnosia	0.108	0.064	0.172	-0.086	0.022	0.281	0.389	-0.015	0.093	-0.078	0.03	-0.035	0.073	0.086	0.195	-0.067	0.041
Hallucinations_visual	0.103	0.002	0.106	-0.056	0.047	0.26	0.364	-0.037	0.066	-0.06	0.043	-0.015	0.088	0.078	0.182	-0.037	0.066
Phantom_taste	0.099	-0.01	0.089	-0.055	0.044	0.282	0.381	-0.058	0.041	-0.01	0.089	-0.004	0.095	0.019	0.118	-0.034	0.065
Hearing_loss	0.097	-0.017	0.08	-0.055	0.042	0.225	0.322	-0.037	0.06	-0.024	0.073	-0.001	0.096	0.055	0.152	-0.038	0.059
Reproductive_abnormally_heavy_periods_clotting	0.095	0.002	0.098	-0.031	0.064	0.126	0.221	-0.047	0.048	-0.059	0.036	0.009	0.105	0.093	0.188	0.005	0.1
Speech_speaking_unrecognizable_words	0.095	0.112	0.207	-0.082	0.013	0.257	0.352	-0.024	0.071	-0.076	0.019	-0.067	0.028	0.103	0.198	-0.068	0.027
Skin_Allergy_other	0.095	0.008	0.102	-0.018	0.077	0.063	0.158	-0.031	0.063	-0.021	0.073	-0.001	0.094	0.04	0.134	0.013	0.107
Reproductive_other_menstrual_issues	0.09	-0.001	0.089	-0.019	0.071	0.082	0.172	-0.017	0.073	-0.017	0.073	0.009	0.099	0.033	0.123	-0.025	0.065
Memory_no_new_memories	0.088	0.099	0.187	-0.076	0.011	0.199	0.287	0.007	0.094	-0.066	0.021	-0.042	0.045	0.045	0.133	-0.058	0.03
Cognitive_Functioning_other	0.087	0.025	0.112	-0.016	0.071	0.071	0.158	-0.008	0.079	-0.025	0.062	-0.016	0.072	0.01	0.097	-0.001	0.086
Respiratory_other	0.086	-0.011	0.075	0.003	0.089	0.044	0.13	-0.014	0.072	0.003	0.089	-0.016	0.07	-0.011	0.075	0.017	0.103
Eye_Vision_redness_outside_eye	0.083	-0.036	0.047	-0.041	0.042	0.205	0.289	-0.033	0.051	-0.048	0.035	0.036	0.12	0.046	0.129	-0.031	0.052
Heightened_smell	0.082	0.014	0.096	-0.044	0.038	0.216	0.298	-0.041	0.042	-0.037	0.045	-0.013	0.069	0.036	0.118	-0.019	0.064
Dermatographia	0.08	-0.014	0.067	-0.039	0.041	0.218	0.298	-0.042	0.038	-0.05	0.03	0.005	0.085	0.085	0.165	-0.045	0.035
Eye_Vision_double_vision	0.08	0.018	0.098	-0.047	0.032	0.235	0.314	-0.037	0.043	-0.06	0.019	0	0.08	0.06	0.139	-0.043	0.037
Sensations_facial_pressure_left	0.079	-0.026	0.054	-0.027	0.053	0.209	0.289	-0.028	0.052	-0.053	0.026	0.016	0.095	0.043	0.123	-0.038	0.041
Hallucinations_auditory	0.071	-0.003	0.068	-0.052	0.019	0.231	0.302	-0.026	0.045	-0.045	0.026	-0.006	0.065	0.048	0.119	-0.037	0.034
Sensations_facial_pressure_right	0.068	-0.045	0.023	-0.038	0.03	0.193	0.261	-0.022	0.046	-0.038	0.03	0.015	0.083	0.06	0.128	-0.037	0.031
Sensations_facial_pressure_other	0.06	-0.018	0.042	-0.026	0.034	0.116	0.176	-0.017	0.043	-0.041	0.019	0.026	0.087	0.035	0.095	-0.015	0.045
SkinAllergy_other_itchy	0.057	-0.012	0.046	-0.024	0.033	0.087	0.144	-0.013	0.044	-0.007	0.051	-0.002	0.055	0.018	0.075	-0.007	0.051
Speech_changes_to_secondary_languages	0.056	0.073	0.128	-0.044	0.011	0.096	0.152	0.012	0.068	-0.04	0.016	-0.03	0.026	0.024	0.08	-0.037	0.018
Inability_to_yawn	0.054	-0.015	0.039	-0.002	0.052	0.1	0.154	-0.028	0.026	-0.037	0.017	0.031	0.085	0.031	0.085	-0.024	0.03
Ear_numbness	0.049	-0.03	0.02	-0.029	0.021	0.204	0.253	-0.025	0.024	-0.033	0.017	0	0.05	0.028	0.077	-0.028	0.021
Coughing_up_blood	0.048	-0.012	0.036	-0.01	0.038	0.083	0.13	-0.02	0.028	-0.031	0.017	0.013	0.061	0.021	0.069	0.003	0.051
Speech_other	0.043	0.022	0.065	-0.009	0.034	0.056	0.099	-0.004	0.039	-0.018	0.025	-0.013	0.03	0.016	0.059	-0.019	0.024
New_anaphylaxis	0.043	-0.017	0.026	-0.012	0.031	0.119	0.162	-0.023	0.02	-0.029	0.014	0.012	0.055	0.031	0.074	-0.022	0.021
Eye_Vision_tunnel_vision	0.038	0.004	0.042	-0.028	0.01	0.128	0.166	-0.018	0.02	-0.03	0.008	-0.007	0.032	0.039	0.077	-0.02	0.018
Reproductive_testicle_penis_pain_changes	0.036	-0.006	0.031	-0.002	0.034	0.025	0.061	-0.003	0.033	-0.011	0.026	0.002	0.039	0.013	0.049	-0.005	0.031
Hallucinations_tactile	0.034	-0.006	0.028	-0.024	0.009	0.136	0.17	-0.019	0.014	-0.025	0.009	0.001	0.034	0.025	0.059	-0.024	0.01
Sensations_facial_paralysis	0.032	-0.009	0.023	-0.014	0.018	0.085	0.117	-0.011	0.021	-0.025	0.007	0.019	0.051	0.015	0.047	-0.019	0.013
Heightened_taste	0.031	0.007	0.037	-0.025	0.006	0.109	0.14	-0.02	0.011	-0.018	0.012	-0.012	0.019	0.028	0.059	-0.011	0.02
SkinAllergy_shingles	0.026	-0.001	0.024	-0.006	0.019	0.051	0.077	-0.01	0.015	-0.012	0.014	0.01	0.036	-0.001	0.025	-0.006	0.02
Hallucinations_other	0.023	-0.004	0.02	-0.013	0.01	0.036	0.059	-0.008	0.015	-0.009	0.015	0.003	0.026	0.016	0.039	0.001	0.024
Reproductive_postmenopausal_bleeding	0.016	-0.005	0.011	-0.001	0.015	0.019	0.036	-0.005	0.011	-0.01	0.006	-0.002	0.014	0.01	0.026	0.007	0.023
Reproductive_early_menopause	0.014	0.006	0.02	-0.009	0.005	0.018	0.032	-0.006	0.008	-0.003	0.011	0.003	0.017	0.006	0.02	-0.001	0.013
Eye_Vision_loss_of_vision	0.011	0	0.011	-0.008	0.003	0.04	0.051	-0.007	0.004	-0.008	0.003	0.003	0.014	0.005	0.016	-0.005	0.006

## Sheet: Sheet2
cluster	enriched treshold	disenriched threshold
0	0.1	-0.1
1	0.1	-0.1
2	0.1	-0.1
3	0.1	-0.1
4	0.1	-0.1
5	0.1	-0.1
6	0.1	-0.1
7	0.1	-0.1
